# Supplementary material for: A novel bivalent chromatin associates with rapid induction of camalexin biosynthesis genes in response to a pathogen signal in Arabidopsis
Source: eLife. 2021 Sep 15;10:e69508. doi: 10.7554/eLife.69508 (PMC8547951; doi:10.7554/eLife.69508)
Supplement: Figure 1—source data 1. [file elife-69508-fig1-data1.xlsx]

## Sheet: Fig.1A
	Domain	H3K4me2	H3K4me3	H3K9ac	H3K9me2	H3K18ac	H3K27me1	H3K27me3	H3K36me2	H3K36me3	H3K27me2	H2Bub	5mC	H3K4me1	H4K5ac	H3.1	H3.3
	Amines_and_Polyamines_Metabolism	NA	NA	NA	NA	NA	NA	NA	NA	NA	NA	NA	NA	NA	NA	NA	NA
	Amino_Acids_Metabolism	NA	0.610944	NA	0.578458	NA	NA	-1.39114	0.552676	0.618129	NA	0.530661	NA	NA	NA	NA	NA
	Carbohydrates_Metabolism	NA	NA	NA	-1.90607	NA	-0.731663	NA	NA	NA	NA	NA	NA	NA	NA	NA	NA
	Detoxification_Metabolism	NA	-0.539263	NA	-3.33549	0.58	-1.99115	-0.52898	NA	NA	NA	NA	NA	NA	NA	NA	NA
	Energy_Metabolism	NA	0.70083	0.65298	-0.762928	NA	-0.681628	-1.30552	NA	0.500166	NA	NA	-0.518988	NA	NA	NA	NA
	Fatty_Acids_and_Lipids_Metabolism	NA	NA	NA	-0.733983	NA	-1.0335	NA	NA	NA	NA	NA	NA	NA	NA	NA	NA
	Hormones_Metabolism	NA	NA	NA	-0.835981	NA	NA	0.814572	-0.811207	-1.02889	NA	-1.5655	NA	-0.988543	NA	NA	NA
	Inorganic_Nutrients_Metabolism	NA	NA	NA	-2.36019	NA	-3.60082	0.598319	NA	-0.60829	NA	NA	NA	NA	NA	NA	NA
	Nucleotides_Metabolism	NA	NA	NA	1.43848	NA	1.44401	-1.61161	NA	0.599702	NA	0.728451	NA	NA	NA	NA	NA
	Primary-Specialized_Interface_Metabolism	0.622172	NA	NA	NA	-1.04556	NA	-3.78944	0.87524	0.612144	NA	0.942492	NA	1.01695	NA	-0.797439	NA
	Redox_Metabolism	-0.664864	-0.536114	-0.707309	NA	NA	NA	1.09377	-1.05157	-0.895734	NA	-1.55956	NA	NA	NA	NA	NA
	Specialized_Metabolism	NA	NA	NA	-2.65478	0.69118	-0.947872	0.944178	-0.789912	-0.968943	NA	-1.75812	NA	-0.756938	NA	NA	NA

## Sheet: Fig.1B
H3K18ac total enzymes 3219		H3K27me3 enzymes 2258		H3K18ac and H3K27me3 overlapped enzyzmes:1421				H3K27me3 Specialized genes: 456		H3K18ac Specialized genes: 525		H3K18ac and H3K27me3 overlapped specialized genes: 327
AT5G61700		AT4G15340		AT4G15340				AT1G01190		AT1G01190		AT1G01190
AT1G21860		AT5G42600		AT5G42600				AT1G01390		AT1G01390		AT1G01390
AT5G61690		AT1G61120		AT1G61120				AT1G01420		AT1G01420		AT1G01420
AT5G24240		AT3G47770		AT3G47770				AT1G01980		AT1G01800		AT1G01980
AT1G68750		AT4G15370		AT4G15370				AT1G02050		AT1G01980		AT1G02050
AT3G55590		AT5G61700		AT5G61700				AT1G06620		AT1G02050		AT1G09490
AT5G03795		AT3G28415		AT3G28415				AT1G06820		AT1G03400		AT1G09510
AT2G32620		AT5G60010		AT5G60010				AT1G09240		AT1G03410		AT1G11610
AT3G03240		AT3G28390		AT3G28390				AT1G09480		AT1G04350		AT1G11770
AT4G28940		AT5G48010		AT5G48010				AT1G09490		AT1G06000		AT1G12200
AT5G51480		AT3G29255		AT3G29255				AT1G09500		AT1G06640		AT1G13710
AT1G14110		AT2G13810		AT2G13810				AT1G09510		AT1G06645		AT1G16400
AT1G27620		AT3G28360		AT3G28360				AT1G11610		AT1G06650		AT1G16410
AT3G17500		AT1G33750		AT1G33750				AT1G11770		AT1G07240		AT1G17010
AT3G62710		AT2G23170		AT2G23170				AT1G12130		AT1G07250		AT1G17020
AT1G02205		AT1G21860		AT1G21860				AT1G12160		AT1G07260		AT1G17420
AT3G17320		AT4G02780		AT5G24140				AT1G12200		AT1G09490		AT1G18140
AT2G34370		AT5G24140		AT5G55250				AT1G12740		AT1G09510		AT1G19250
AT3G17490		AT5G55250		AT4G15290				AT1G13710		AT1G10810		AT1G19540
AT3G47220		AT4G15290		AT5G25980				AT1G16400		AT1G11610		AT1G21100
AT3G47740		AT5G25980		AT1G57800				AT1G16410		AT1G11680		AT1G21110
AT5G12000		AT1G57800		AT5G04970				AT1G17010		AT1G11770		AT1G21120
AT5G56330		AT5G04970		AT1G51470				AT1G17020		AT1G12140		AT1G21130
AT1G09550		AT1G51470		AT3G47760				AT1G17060		AT1G12200		AT1G21440
AT1G75930		AT3G47760		AT5G61730				AT1G17420		AT1G13090		AT1G21530
AT5G16700		AT5G61730		AT5G61690				AT1G18140		AT1G13100		AT1G24430
AT1G02190		AT5G61690		AT4G15320				AT1G19250		AT1G13710		AT1G26380
AT1G51300		AT4G15320		AT5G26150				AT1G19540		AT1G14190		AT1G26390
AT4G33220		AT5G26150		AT3G26820				AT1G21100		AT1G14810		AT1G26400
AT1G09090		AT3G26820		AT2G30660				AT1G21110		AT1G16400		AT1G26410
AT5G66200		AT2G30660		AT1G47600				AT1G21120		AT1G16410		AT1G26420
AT1G25145		AT1G47600		AT1G44318				AT1G21130		AT1G17010		AT1G28170
AT1G50440		AT1G44318		AT2G38920				AT1G21440		AT1G17020		AT1G28640
AT2G36230		AT2G38920		AT5G26000				AT1G21530		AT1G17420		AT1G28650
AT3G62590		AT5G26000		AT4G11030				AT1G21540		AT1G18140		AT1G28660
AT4G12250		AT4G11030		AT1G12570				AT1G21850		AT1G19250		AT1G30700
AT4G23660		AT1G12570		AT5G24240				AT1G22100		AT1G19540		AT1G30710
AT4G38650		AT5G24240		AT2G37730				AT1G24430		AT1G21100		AT1G30720
AT5G11720		AT2G37730		AT5G23020				AT1G24735		AT1G21110		AT1G30730
AT5G66500		AT5G23020		AT1G65860				AT1G26360		AT1G21120		AT1G30740
AT5G66510		AT1G65860		AT2G19060				AT1G26380		AT1G21130		AT1G30760
AT1G24793		AT2G19060		AT5G51490				AT1G26390		AT1G21440		AT1G32910
AT1G25054		AT5G51490		AT5G23990				AT1G26400		AT1G21530		AT1G33720
AT1G75010		AT5G23990		AT1G31670				AT1G26410		AT1G24100		AT1G33750
AT2G31810		AT1G31670		AT5G48110				AT1G26420		AT1G24420		AT1G34040
AT2G42690		AT5G48110		AT2G30650				AT1G28170		AT1G24430		AT1G34060
AT3G04010		AT2G30650		AT3G21720				AT1G28430		AT1G24807		AT1G34575
AT3G10700		AT3G21720		AT5G11540				AT1G28590		AT1G24909		AT1G41830
AT3G53950		AT5G11540		AT1G68750				AT1G28640		AT1G25083		AT1G47600
AT4G00750		AT1G68750		AT3G43860				AT1G28650		AT1G25155		AT1G48800
AT4G01820		AT4G03050		AT3G45810				AT1G28660		AT1G25220		AT1G51210
AT4G38300		AT3G43860		AT1G33720				AT1G30100		AT1G26380		AT1G51470
AT5G01980		AT3G45810		AT5G23010				AT1G30530		AT1G26390		AT1G51990
AT5G15870		AT1G33720		AT5G58860				AT1G30700		AT1G26400		AT1G54040
AT5G44930		AT5G23010		AT3G09930				AT1G30710		AT1G26410		AT1G54870
AT5G62560		AT5G58860		AT5G36150				AT1G30720		AT1G26420		AT1G58260
AT5G64920		AT3G09930		AT3G09220				AT1G30730		AT1G28170		AT1G58936
AT1G80860		AT4G32810		AT4G13290				AT1G30740		AT1G28610		AT1G59950
AT1G03940		AT5G36150		AT1G54870				AT1G30760		AT1G28640		AT1G59960
AT1G05120		AT3G09220		AT1G16410				AT1G32100		AT1G28650		AT1G61120
AT1G08315		AT4G13290		AT3G28345				AT1G32910		AT1G28660		AT1G61680
AT1G75420		AT1G54870		AT2G32860				AT1G33540		AT1G28670		AT1G62540
AT2G02220		AT1G16410		AT5G63600				AT1G33720		AT1G28680		AT1G62560
AT2G17210		AT3G28345		AT3G22250				AT1G33750		AT1G30700		AT1G62570
AT3G07360		AT2G32860		AT1G72110				AT1G34040		AT1G30710		AT1G63140
AT3G07480		AT5G63600		AT2G32610				AT1G34060		AT1G30720		AT1G64910
AT3G49220		AT3G22250		AT3G55590				AT1G34575		AT1G30730		AT1G64920
AT5G20940		AT1G72110		AT2G28780				AT1G41830		AT1G30740		AT1G65670
AT5G65500		AT2G32610		AT3G44830				AT1G47600		AT1G30760		AT1G65860
AT1G15140		AT3G55590		AT2G46750				AT1G48800		AT1G31180		AT1G65880
AT1G20490		AT1G51490		AT4G19380				AT1G48820		AT1G31950		AT1G65890
AT1G59720		AT2G28780		AT4G15310				AT1G51210		AT1G32910		AT1G66020
AT2G01290		AT3G44830		AT1G16400				AT1G51470		AT1G33720		AT1G66270
AT2G46210		AT2G46750		AT4G31970				AT1G51490		AT1G33750		AT1G66280
AT2G46505		AT4G19380		AT1G67110				AT1G51990		AT1G34040		AT1G66690
AT3G04880		AT4G15310		AT4G20230				AT1G54040		AT1G34060		AT1G66700
AT3G15530		AT1G16400		AT1G22015				AT1G54870		AT1G34575		AT1G66720
AT3G46480		AT4G31970		AT3G45580				AT1G55020		AT1G36180		AT1G66960
AT3G48030		AT1G67110		AT4G16740				AT1G56430		AT1G41830		AT1G68270
AT3G51320		AT4G20230		AT4G20235				AT1G58260		AT1G47600		AT1G71170
AT3G63380		AT1G22015		AT4G31910				AT1G58265		AT1G48800		AT1G72520
AT4G19010		AT3G45580		AT5G24550				AT1G58936		AT1G50520		AT1G73280
AT4G24220		AT4G16740		AT5G03795				AT1G59950		AT1G50560		AT1G73290
AT4G29260		AT4G20235		AT2G19070				AT1G59960		AT1G50580		AT1G73300
AT4G29680		AT4G31910		AT1G66280				AT1G61120		AT1G51210		AT1G73310
AT5G16150		AT5G24550		AT1G71691				AT1G61680		AT1G51470		AT1G74010
AT5G52850		AT5G03795		AT5G37920				AT1G61720		AT1G51680		AT1G78490
AT5G54960		AT2G19070		AT1G23200				AT1G61810		AT1G51990		AT1G78955
AT5G65920		AT1G66280		AT5G26120				AT1G61820		AT1G54040		AT1G78970
AT5G66680		AT1G71691		AT3G26770				AT1G62540		AT1G54870		AT1G80820
AT1G05750		AT5G37920		AT1G66270				AT1G62560		AT1G55290		AT2G14100
AT1G08250		AT1G23200		AT2G39040				AT1G62570		AT1G55320		AT2G16890
AT1G12850		AT5G26120		AT5G23960				AT1G63140		AT1G55940		AT2G18560
AT1G73160		AT3G26770		AT4G20240				AT1G64910		AT1G58260		AT2G18570
AT1G77240		AT1G66270		AT5G63590				AT1G64920		AT1G58440		AT2G19070
AT2G31100		AT2G39040		AT5G42590				AT1G65060		AT1G58643		AT2G21730
AT2G45310		AT5G23960		AT4G01890				AT1G65670		AT1G58936		AT2G21890
AT3G19380		AT4G20240		AT4G15396				AT1G65860		AT1G59312		AT2G22330
AT3G23770		AT5G63590		AT2G32620				AT1G65880		AT1G59950		AT2G22930
AT3G55810		AT5G42590		AT3G03240				AT1G65890		AT1G59960		AT2G23190
AT3G61530		AT4G01890		AT4G28940				AT1G66020		AT1G60710		AT2G23220
AT4G17830		AT4G15396		AT5G51480				AT1G66270		AT1G60730		AT2G23260
AT4G37270		AT2G32620		AT3G01420				AT1G66280		AT1G60750		AT2G23400
AT4G37690		AT3G03240		AT5G03820				AT1G66690		AT1G61120		AT2G23410
AT4G38570		AT4G28940		AT4G39650				AT1G66700		AT1G61680		AT2G23510
AT5G44000		AT5G51480		AT4G23560				AT1G66720		AT1G62540		AT2G24850
AT5G61550		AT3G01420		AT5G23980				AT1G66800		AT1G62560		AT2G25160
AT5G63380		AT5G03820		AT1G48800				AT1G66960		AT1G62570		AT2G25450
AT1G21400		AT4G39650		AT2G16230				AT1G68040		AT1G62580		AT2G27000
AT1G22620		AT4G23560		AT2G44550				AT1G68270		AT1G62600		AT2G27010
AT1G24180		AT5G23980		AT3G14490				AT1G70080		AT1G62620		AT2G29350
AT1G27940		AT1G48800		AT1G11370				AT1G70560		AT1G62900		AT2G29390
AT1G52710		AT2G16230		AT1G14110				AT1G71170		AT1G63140		AT2G30210
AT2G19570		AT2G44550		AT1G27620				AT1G72520		AT1G63340		AT2G30670
AT2G21090		AT3G14490		AT3G17500				AT1G73270		AT1G63370		AT2G30750
AT2G22900		AT1G11370		AT3G62710				AT1G73280		AT1G63390		AT2G30770
AT2G30550		AT4G20210		AT4G15380				AT1G73290		AT1G64910		AT2G33070
AT2G42010		AT1G14110		AT3G24290				AT1G73300		AT1G64920		AT2G34490
AT2G45270		AT1G27620		AT1G65890				AT1G73310		AT1G65670		AT2G34790
AT2G47130		AT3G17500		AT4G20200				AT1G74000		AT1G65860		AT2G36690
AT2G47730		AT3G62710		AT3G26610				AT1G74010		AT1G65880		AT2G36760
AT3G02840		AT4G15380		AT1G28700				AT1G76290		AT1G65890		AT2G36770
AT3G04650		AT3G24290		AT4G39000				AT1G77520		AT1G66020		AT2G36780
AT3G32920		AT1G65890		AT2G38080				AT1G77530		AT1G66270		AT2G36790
AT3G42180		AT4G20200		AT5G17750				AT1G78390		AT1G66280		AT2G37040
AT3G51970		AT3G26610		AT1G63450				AT1G78490		AT1G66540		AT2G37790
AT3G57430		AT1G28700		AT3G26140				AT1G78500		AT1G66690		AT2G38080
AT3G63410		AT4G39000		AT5G24910				AT1G78955		AT1G66700		AT2G38240
AT4G09990		AT2G38080		AT4G28090				AT1G78960		AT1G66720		AT2G38920
AT4G27470		AT5G17750		AT5G38450				AT1G78970		AT1G66960		AT2G40370
AT4G27960		AT1G63450		AT3G17530				AT1G79370		AT1G67560		AT2G43820
AT4G40070		AT3G26140		AT1G26320				AT1G80820		AT1G68270		AT2G44990
AT5G16910		AT5G24910		AT1G56040				AT2G14100		AT1G69370		AT2G45400
AT5G18220		AT4G28090		AT2G47550				AT2G16890		AT1G71170		AT2G45550
AT5G19410		AT5G38450		AT1G44350				AT2G18560		AT1G71180		AT2G45560
AT5G24318		AT3G17530		AT1G02205				AT2G18570		AT1G72520		AT3G09220
AT5G40150		AT1G26320		AT3G17320				AT2G19070		AT1G73280		AT3G09260
AT5G40390		AT1G56040		AT4G13300				AT2G21730		AT1G73290		AT3G10340
AT5G43790		AT2G47550		AT3G29430				AT2G21890		AT1G73300		AT3G14490
AT1G13700		AT1G44350		AT5G48000				AT2G22330		AT1G73310		AT3G14520
AT1G22950		AT1G02205		AT1G66950				AT2G22590		AT1G73880		AT3G16390
AT1G70090		AT3G17320		AT1G28650				AT2G22930		AT1G74010		AT3G16400
AT2G07680		AT4G13300		AT3G25820				AT2G22960		AT1G74020		AT3G16410
AT2G18730		AT3G29430		AT3G25620				AT2G23010		AT1G74090		AT3G20960
AT2G44410		AT5G48000		AT5G51500				AT2G23190		AT1G74100		AT3G21230
AT2G45880		AT1G66950		AT5G43590				AT2G23220		AT1G74540		AT3G21240
AT2G46620		AT1G28650		AT1G66040				AT2G23230		AT1G75300		AT3G21560
AT2G47700		AT3G25820		AT2G43610				AT2G23260		AT1G75960		AT3G21750
AT2G47800		AT3G25620		AT1G66960				AT2G23400		AT1G76160		AT3G21790
AT3G04750		AT5G51500		AT3G17540				AT2G23410		AT1G76470		AT3G21800
AT3G06060		AT5G43590		AT4G33790				AT2G23510		AT1G77060		AT3G21950
AT3G14960		AT1G66040		AT2G34370				AT2G23910		AT1G78490		AT3G22400
AT3G16850		AT2G43610		AT3G17490				AT2G24210		AT1G78550		AT3G24220
AT3G20170		AT1G66960		AT3G47220				AT2G24850		AT1G78955		AT3G25180
AT3G23820		AT3G17540		AT3G47740				AT2G25150		AT1G78970		AT3G25810
AT3G24040		AT4G33790		AT5G12000				AT2G25160		AT1G78990		AT3G25820
AT3G25610		AT2G23230		AT5G56330				AT2G25450		AT1G80560		AT3G25830
AT3G44720		AT2G34370		AT3G16410				AT2G27000		AT1G80820		AT3G26150
AT3G47350		AT3G17490		AT5G04960				AT2G27010		AT2G02400		AT3G26160
AT4G03550		AT3G47220		AT4G22080				AT2G27570		AT2G05180		AT3G26170
AT4G05400		AT3G47740		AT1G59500				AT2G29130		AT2G14060		AT3G26190
AT4G29250		AT5G12000		AT3G47190				AT2G29350		AT2G14100		AT3G26200
AT4G38540		AT5G44630		AT3G48310				AT2G29370		AT2G15480		AT3G26270
AT5G11770		AT5G56330		AT4G02180				AT2G29390		AT2G15490		AT3G26280
AT5G18210		AT3G16410		AT3G10340				AT2G29730		AT2G16890		AT3G26830
AT5G20040		AT5G04960		AT3G47750				AT2G29750		AT2G18560		AT3G29110
AT5G20870		AT4G22080		AT1G65450				AT2G30210		AT2G18570		AT3G29190
AT5G20950		AT1G59500		AT2G16730				AT2G30670		AT2G19070		AT3G29255
AT5G40140		AT3G47190		AT4G22110				AT2G30750		AT2G20610		AT3G29630
AT5G59070		AT3G48310		AT5G36110				AT2G30770		AT2G21730		AT3G29635
AT5G63620		AT4G02180		AT2G41850				AT2G30830		AT2G21890		AT3G29680
AT5G64660		AT3G10340		AT4G29580				AT2G30840		AT2G22330		AT3G30280
AT5G66070		AT3G47750		AT5G44620				AT2G33070		AT2G22830		AT3G30290
AT5G22510		AT1G65450		AT3G01270				AT2G34490		AT2G22930		AT3G32030
AT1G02720		AT2G16730		AT1G54010				AT2G34790		AT2G23190		AT3G32047
AT1G05180		AT4G22110		AT3G25830				AT2G34810		AT2G23220		AT3G44250
AT1G09220		AT5G36110		AT3G62170				AT2G36690		AT2G23260		AT3G44300
AT1G14200		AT2G41850		AT5G41500				AT2G36760		AT2G23400		AT3G44840
AT1G24290		AT4G29580		AT4G38990				AT2G36770		AT2G23410		AT3G44970
AT1G33590		AT5G44620		AT5G07480				AT2G36780		AT2G23510		AT3G45070
AT1G35420		AT3G01270		AT3G09940				AT2G36790		AT2G24180		AT3G45080
AT1G36580		AT1G54010		AT5G37910				AT2G37040		AT2G24190		AT3G46700
AT1G49780		AT3G25830		AT5G50770				AT2G37790		AT2G24850		AT3G47170
AT1G71100		AT3G62170		AT1G59680				AT2G38080		AT2G25160		AT3G48270
AT1G73480		AT5G41500		AT5G07080				AT2G38240		AT2G25450		AT3G48280
AT1G74920		AT4G38990		AT1G09550				AT2G38920		AT2G26480		AT3G48290
AT1G75000		AT5G07480		AT1G75930				AT2G40370		AT2G26750		AT3G48300
AT1G80950		AT3G09940		AT5G16700				AT2G43820		AT2G27000		AT3G48310
AT2G02970		AT5G37910		AT5G17740				AT2G44800		AT2G27010		AT3G48320
AT2G14120		AT5G50770		AT1G31690				AT2G44990		AT2G27150		AT3G50300
AT2G17130		AT1G59680		AT2G15350				AT2G45400		AT2G29150		AT3G50740
AT2G22120		AT5G07080		AT5G36200				AT2G45550		AT2G29290		AT3G53150
AT2G22890		AT1G09550		AT1G60360				AT2G45560		AT2G29300		AT3G53280
AT2G22910		AT1G33540		AT1G55560				AT3G02020		AT2G29340		AT3G53290
AT2G30720		AT1G73270		AT2G19010				AT3G03480		AT2G29350		AT3G53300
AT2G32170		AT1G75930		AT2G40370				AT3G09220		AT2G29390		AT3G53305
AT2G33230		AT4G16730		AT1G11920				AT3G09260		AT2G29710		AT3G61035
AT2G46110		AT5G16700		AT3G25810				AT3G10340		AT2G29720		AT3G61040
AT3G01720		AT5G17740		AT5G24540				AT3G11180		AT2G29740		AT4G10500
AT3G01750		AT1G31690		AT3G21370				AT3G11480		AT2G30150		AT4G13280
AT3G03550		AT2G15350		AT4G37390				AT3G12203		AT2G30210		AT4G13290
AT3G05200		AT5G36200		AT1G51040				AT3G12900		AT2G30670		AT4G13300
AT3G06830		AT1G60360		AT4G26420				AT3G14490		AT2G30750		AT4G13310
AT3G08710		AT1G55560		AT5G17040				AT3G14520		AT2G30770		AT4G13770
AT3G11840		AT2G19010		AT1G08990				AT3G16390		AT2G33070		AT4G15260
AT3G23410		AT2G40370		AT4G32380				AT3G16400		AT2G33590		AT4G15270
AT3G52430		AT1G11920		AT1G50960				AT3G16410		AT2G33600		AT4G15280
AT3G54950		AT3G25810		AT1G51260				AT3G19000		AT2G33630		AT4G15300
AT3G62530		AT5G24540		AT4G16745				AT3G19710		AT2G34490		AT4G15310
AT3G63150		AT3G21370		AT5G47300				AT3G20950		AT2G34500		AT4G15330
AT3G63510		AT4G37390		AT1G02190				AT3G20960		AT2G34790		AT4G15340
AT4G12710		AT1G51040		AT1G51300				AT3G21230		AT2G35660		AT4G15350
AT4G22980		AT4G26420		AT4G33220				AT3G21240		AT2G36690		AT4G15360
AT4G24810		AT5G17040		AT1G09090				AT3G21420		AT2G36760		AT4G15370
AT4G27710		AT1G08990		AT4G19800				AT3G21560		AT2G36770		AT4G15380
AT4G29130		AT4G32380		AT4G27420				AT3G21750		AT2G36780		AT4G15390
AT4G35790		AT1G50960		AT4G15393				AT3G21790		AT2G36790		AT4G15393
AT4G38500		AT1G51260		AT4G11050				AT3G21800		AT2G36800		AT4G15396
AT5G03910		AT4G16745		AT5G23970				AT3G21950		AT2G37040		AT4G15400
AT5G04540		AT5G47300		AT2G36690				AT3G22400		AT2G37790		AT4G15440
AT5G18280		AT1G02190		AT3G61040				AT3G24220		AT2G38040		AT4G16740
AT5G18660		AT1G51300		AT2G25370				AT3G25180		AT2G38080		AT4G18350
AT5G22630		AT4G33220		AT1G66120				AT3G25810		AT2G38240		AT4G20200
AT5G29560		AT1G09090		AT3G17560				AT3G25820		AT2G38920		AT4G20230
AT5G41240		AT1G52695		AT1G54560				AT3G25830		AT2G39980		AT4G20240
AT5G42370		AT1G71380		AT4G00400				AT3G26150		AT2G40230		AT4G20800
AT5G47840		AT2G23580		AT2G44560				AT3G26160		AT2G40370		AT4G22690
AT5G48840		AT2G24210		AT3G24700				AT3G26170		AT2G40890		AT4G22710
AT5G53300		AT3G45570		AT4G23600				AT3G26190		AT2G42850		AT4G28420
AT5G57450		AT4G19800		AT4G31940				AT3G26200		AT2G43820		AT4G29120
AT5G62530		AT4G27420		AT5G58910				AT3G26270		AT2G43840		AT4G31940
AT5G63840		AT4G15393		AT1G64910				AT3G26280		AT2G44990		AT4G31950
AT5G64070		AT4G11050		AT2G47030				AT3G26290		AT2G45400		AT4G31970
AT4G39120		AT5G23970		AT1G06350				AT3G26320		AT2G45550		AT4G35160
AT5G09800		AT2G36690		AT1G66050				AT3G26330		AT2G45560		AT4G36220
AT1G03990		AT3G61040		AT1G78970				AT3G26830		AT2G45570		AT4G37360
AT1G07670		AT2G25370		AT2G46495				AT3G28740		AT2G45580		AT4G37370
AT1G10360		AT1G66120		AT2G47040				AT3G29110		AT3G01310		AT4G37410
AT1G18485		AT3G17560		AT5G48375				AT3G29190		AT3G04000		AT4G37980
AT1G19300		AT1G54560		AT1G19250				AT3G29255		AT3G04870		AT4G37990
AT1G19580		AT4G00400		AT3G49960				AT3G29410		AT3G09220		AT4G39950
AT1G22670		AT2G44560		AT5G07420				AT3G29630		AT3G09260		AT5G01040
AT1G23020		AT3G24700		AT2G19050				AT3G29635		AT3G10050		AT5G01050
AT1G29710		AT4G23600		AT2G29940				AT3G29680		AT3G10230		AT5G01190
AT1G30290		AT4G31940		AT3G13400				AT3G30280		AT3G10340		AT5G03490
AT1G31190		AT5G58910		AT4G28850				AT3G30290		AT3G10450		AT5G03980
AT1G33250		AT1G64910		AT1G55790				AT3G32030		AT3G12220		AT5G04230
AT1G47420		AT2G47030		AT2G46494				AT3G32047		AT3G13610		AT5G04330
AT1G50430		AT1G06350		AT4G15980				AT3G44250		AT3G14440		AT5G04370
AT1G55980		AT1G66050		AT4G15330				AT3G44300		AT3G14490		AT5G04950
AT1G59030		AT1G78970		AT1G10680				AT3G44310		AT3G14520		AT5G05260
AT1G66160		AT2G46495		AT1G31710				AT3G44320		AT3G14540		AT5G05600
AT1G66970		AT2G47040		AT4G15350				AT3G44840		AT3G14610		AT5G07080
AT1G67410		AT5G48375		AT3G21800				AT3G44860		AT3G14620		AT5G07480
AT1G67940		AT1G19250		AT3G47170				AT3G44870		AT3G14650		AT5G07990
AT1G71040		AT3G49960		AT3G55130				AT3G44970		AT3G14660		AT5G09360
AT1G71500		AT5G07420		AT3G16400				AT3G45070		AT3G14690		AT5G09970
AT1G78270		AT2G19050		AT2G22950				AT3G45080		AT3G16390		AT5G10600
AT1G78910		AT2G29940		AT4G31950				AT3G45140		AT3G16400		AT5G12270
AT1G80290		AT3G13400		AT3G03670				AT3G46700		AT3G16410		AT5G13930
AT2G20810		AT4G28850		AT3G11430				AT3G47170		AT3G16520		AT5G14860
AT2G24630		AT1G55790		AT4G37990				AT3G48270		AT3G16910		AT5G16340
AT2G27340		AT2G46494		AT5G23190				AT3G48280		AT3G19450		AT5G17040
AT2G34980		AT4G28410		AT1G13710				AT3G48290		AT3G19820		AT5G17540
AT2G36910		AT1G14120		AT1G14550				AT3G48300		AT3G20080		AT5G20960
AT2G42030		AT1G43800		AT1G66490				AT3G48310		AT3G20090		AT5G23010
AT2G44520		AT3G17570		AT4G24140				AT3G48320		AT3G20100		AT5G23020
AT2G44660		AT3G20710		AT3G45130				AT3G50300		AT3G20130		AT5G23940
AT2G44970		AT4G11290		AT1G51290				AT3G50740		AT3G20140		AT5G23960
AT2G45460		AT4G35650		AT3G22730				AT3G53150		AT3G20935		AT5G23970
AT2G47000		AT5G17330		AT1G11610				AT3G53280		AT3G20940		AT5G24140
AT3G03980		AT4G15980		AT3G60120				AT3G53290		AT3G20960		AT5G24160
AT3G05545		AT4G15330		AT4G33330				AT3G53300		AT3G21230		AT5G24950
AT3G10390		AT1G10680		AT5G48140				AT3G53305		AT3G21240		AT5G24960
AT3G11420		AT1G31710		AT5G63595				AT3G55120		AT3G21560		AT5G25130
AT3G14920		AT4G15350		AT1G57750				AT3G55870		AT3G21750		AT5G25180
AT3G17240		AT3G21800		AT1G75940				AT3G55970		AT3G21790		AT5G25980
AT3G18930		AT3G47170		AT2G22330				AT3G59710		AT3G21800		AT5G26000
AT3G19620		AT3G55130		AT4G26260				AT3G61035		AT3G21950		AT5G26310
AT3G45040		AT3G16400		AT1G78490				AT3G61040		AT3G22400		AT5G28237
AT3G54240		AT2G22950		AT5G65800				AT3G61400		AT3G24220		AT5G28510
AT3G55430		AT4G31950		AT4G09120				AT4G02780		AT3G25180		AT5G35715
AT3G60080		AT3G03670		AT2G36780				AT4G03050		AT3G25810		AT5G35917
AT3G63010		AT3G11430		AT4G15300				AT4G10490		AT3G25820		AT5G36110
AT4G05530		AT4G37990		AT5G46540				AT4G10500		AT3G25830		AT5G36140
AT4G13400		AT5G23190		AT2G38240				AT4G13280		AT3G26150		AT5G36150
AT4G14880		AT1G13710		AT3G44540				AT4G13290		AT3G26160		AT5G36180
AT4G16530		AT1G14550		AT5G25370				AT4G13300		AT3G26170		AT5G36220
AT4G25220		AT1G66490		AT2G14960				AT4G13310		AT3G26180		AT5G37170
AT4G35260		AT4G24140		AT1G54940				AT4G13660		AT3G26190		AT5G37950
AT4G37000		AT3G45130		AT1G55570				AT4G13770		AT3G26200		AT5G37970
AT4G38270		AT1G51290		AT4G22090				AT4G15260		AT3G26210		AT5G37990
AT4G38370		AT3G22730		AT3G16390				AT4G15270		AT3G26230		AT5G38010
AT5G05480		AT1G11610		AT1G19900				AT4G15280		AT3G26270		AT5G38020
AT5G09760		AT3G60120		AT2G23220				AT4G15300		AT3G26280		AT5G38100
AT5G17670		AT4G33330		AT2G46760				AT4G15310		AT3G26300		AT5G38130
AT5G25760		AT5G48140		AT1G53820				AT4G15330		AT3G26310		AT5G38710
AT5G27320		AT5G63595		AT5G51930				AT4G15340		AT3G26830		AT5G38780
AT5G41340		AT1G57750		AT3G07830				AT4G15350		AT3G29110		AT5G42580
AT5G52840		AT1G75940		AT3G22740				AT4G15360		AT3G29190		AT5G42590
AT5G55500		AT2G22330		AT5G09970				AT4G15370		AT3G29200		AT5G42600
AT5G60870		AT4G26260		AT1G33730				AT4G15380		AT3G29255		AT5G44380
AT5G65205		AT1G78490		AT1G65990				AT4G15390		AT3G29630		AT5G44390
AT1G02930		AT5G65800		AT3G07840				AT4G15393		AT3G29635		AT5G44400
AT1G03510		AT1G24070		AT3G25180				AT4G15396		AT3G29680		AT5G44410
AT1G08660		AT1G71160		AT1G12200				AT4G15400		AT3G30280		AT5G44440
AT1G13250		AT1G75790		AT2G44990				AT4G15440		AT3G30290		AT5G44620
AT1G15100		AT2G31770		AT1G02390				AT4G15870		AT3G30775		AT5G45910
AT1G17280		AT3G57620		AT1G66020				AT4G16730		AT3G32030		AT5G47980
AT1G17745		AT4G10740		AT2G25450				AT4G16740		AT3G32047		AT5G47990
AT1G20330		AT5G08460		AT2G38380				AT4G18350		AT3G44250		AT5G48000
AT1G22410		AT4G09120		AT1G58090				AT4G20200		AT3G44300		AT5G48010
AT1G27930		AT2G36780		AT3G44970				AT4G20210		AT3G44840		AT5G48100
AT1G29340		AT4G15300		AT1G30730				AT4G20230		AT3G44970		AT5G48110
AT1G33700		AT5G46540		AT2G46740				AT4G20240		AT3G45070		AT5G48375
AT1G50270		AT2G38240		AT3G47040				AT4G20800		AT3G45080		AT5G53990
AT1G54350		AT3G44540		AT5G27870				AT4G22690		AT3G46660		AT5G54000
AT1G58290		AT5G25370		AT3G24300				AT4G22710		AT3G46680		AT5G54010
AT1G62830		AT2G14960		AT2G28860				AT4G26280		AT3G46690		AT5G54810
AT1G63380		AT1G54940		AT4G13260				AT4G28410		AT3G46700		AT5G56080
AT1G66680		AT1G55570		AT3G19890				AT4G28420		AT3G47170		AT5G57220
AT1G67350		AT4G22090		AT4G15280				AT4G29120		AT3G48270		AT5G58910
AT1G68070		AT3G16390		AT4G33830				AT4G31940		AT3G48280		AT5G59590
AT1G68080		AT1G19900		AT4G33860				AT4G31950		AT3G48290		AT5G63590
AT1G74680		AT2G23220		AT2G38110				AT4G31970		AT3G48300		AT5G63595
AT1G75200		AT2G46760		AT3G55110				AT4G32810		AT3G48310		AT5G63600
AT1G77010		AT1G53820		AT2G29840				AT4G33120		AT3G48320		AT5G67310
AT1G77120		AT5G51930		AT1G05280				AT4G35150		AT3G50270
AT1G80600		AT3G07830		AT1G13130				AT4G35160		AT3G50280
AT2G17265		AT3G22740		AT1G24540				AT4G36220		AT3G50300
AT2G27600		AT5G09970		AT3G53300				AT4G37360		AT3G50740
AT2G32810		AT1G33730		AT4G39950				AT4G37370		AT3G50790
AT2G36730		AT1G65990		AT5G64790				AT4G37400		AT3G53130
AT2G38860		AT3G07840		AT3G04520				AT4G37410		AT3G53150
AT2G38960		AT3G25180		AT3G53290				AT4G37970		AT3G53260
AT2G41760		AT1G12200		AT2G18600				AT4G37980		AT3G53280
AT2G43980		AT2G44990		AT3G16590				AT4G37990		AT3G53290
AT2G47630		AT1G02390		AT4G33230				AT4G39950		AT3G53300
AT3G02850		AT1G66020		AT4G39480				AT5G01040		AT3G53305
AT3G06550		AT2G25450		AT1G53830				AT5G01050		AT3G55850
AT3G07320		AT2G38380		AT1G17010				AT5G01190		AT3G57020
AT3G09580		AT1G58090		AT3G52820				AT5G03260		AT3G57030
AT3G10030		AT3G44970		AT3G24710				AT5G03490		AT3G61035
AT3G10670		AT1G13680		AT5G19880				AT5G03610		AT3G61040
AT3G10920		AT1G32140		AT5G24900				AT5G03980		AT3G61990
AT3G13110		AT1G55020		AT1G65880				AT5G04230		AT3G62000
AT3G13880		AT2G36190		AT3G32047				AT5G04330		AT3G62160
AT3G29010		AT3G55970		AT3G55100				AT5G04370		AT4G00040
AT3G47340		AT3G56700		AT4G08160				AT5G04380		AT4G09670
AT3G47590		AT4G36610		AT4G15390				AT5G04950		AT4G10500
AT3G48090		AT5G19890		AT2G23250				AT5G05260		AT4G12310
AT3G54250		AT5G37300		AT5G47000				AT5G05600		AT4G13280
AT3G57330		AT5G39580		AT1G06090				AT5G07080		AT4G13290
AT3G58830		AT5G49690		AT1G45201				AT5G07480		AT4G13300
AT4G01220		AT1G30730		AT5G64110				AT5G07800		AT4G13310
AT4G02130		AT2G46740		AT4G22710				AT5G07990		AT4G13770
AT4G04870		AT3G47040		AT1G47390				AT5G09360		AT4G14090
AT4G11010		AT5G27870		AT3G47050				AT5G09970		AT4G15260
AT4G11680		AT3G24300		AT3G61510				AT5G10300		AT4G15270
AT4G13890		AT2G28860		AT2G25160				AT5G10600		AT4G15280
AT4G20870		AT4G13260		AT5G37950				AT5G12270		AT4G15300
AT4G23850		AT3G19890		AT5G38000				AT5G13930		AT4G15310
AT4G26690		AT4G15280		AT2G36770				AT5G14860		AT4G15330
AT4G27030		AT4G33830		AT1G64920				AT5G15070		AT4G15340
AT4G29540		AT4G33860		AT3G11325				AT5G15950		AT4G15350
AT4G29900		AT2G38110		AT4G25820				AT5G16340		AT4G15360
AT4G30370		AT3G55110		AT2G16890				AT5G17030		AT4G15370
AT4G35250		AT2G29840		AT3G48300				AT5G17040		AT4G15380
AT4G35460		AT1G05280		AT3G49110				AT5G17050		AT4G15390
AT4G36430		AT1G13130		AT3G60730				AT5G17540		AT4G15393
AT4G38530		AT1G24540		AT4G01950				AT5G20400		AT4G15396
AT5G07720		AT3G53300		AT5G17500				AT5G20550		AT4G15400
AT5G08340		AT4G39950		AT1G75920				AT5G20960		AT4G15440
AT5G13500		AT5G64790		AT4G02300				AT5G22300		AT4G15955
AT5G13870		AT3G04520		AT4G22485				AT5G23010		AT4G16210
AT5G16890		AT3G53290		AT4G24000				AT5G23020		AT4G16330
AT5G20885		AT2G18600		AT5G63560				AT5G23940		AT4G16740
AT5G22750		AT3G16590		AT1G32780				AT5G23960		AT4G18350
AT5G27400		AT4G33230		AT2G33160				AT5G23970		AT4G19170
AT5G27410		AT4G39480		AT5G14860				AT5G24140		AT4G20200
AT5G37960		AT1G53830		AT3G02620				AT5G24150		AT4G20230
AT5G43420		AT1G17010		AT5G04370				AT5G24155		AT4G20240
AT5G48370		AT3G52820		AT4G09110				AT5G24160		AT4G20800
AT5G53050		AT3G24710		AT3G45470				AT5G24950		AT4G20820
AT5G53370		AT5G19880		AT4G19760				AT5G24960		AT4G20830
AT5G58800		AT5G24900		AT5G03810				AT5G25120		AT4G20860
AT5G59770		AT2G31780		AT1G68270				AT5G25130		AT4G21580
AT5G63400		AT1G12160		AT4G15660				AT5G25180		AT4G22690
AT5G63910		AT1G23160		AT4G37770				AT5G25980		AT4G22710
AT5G64640		AT1G30100		AT5G38010				AT5G26000		AT4G25300
AT5G66005		AT1G49570		AT1G64930				AT5G26310		AT4G27250
AT5G66460		AT2G01900		AT3G21950				AT5G28237		AT4G27560
AT5G67290		AT2G26870		AT3G29190				AT5G28510		AT4G27570
AT2G43900		AT3G49120		AT2G18150				AT5G35715		AT4G28420
AT3G47990		AT3G57510		AT4G13310				AT5G35917		AT4G29120
AT4G39500		AT5G02900		AT4G15400				AT5G36110		AT4G31500
AT1G01830		AT5G37470		AT5G54000				AT5G36140		AT4G31940
AT1G03980		AT5G50130		AT2G27940				AT5G36150		AT4G31950
AT1G06410		AT1G65880		AT2G38390				AT5G36180		AT4G31970
AT1G12350		AT3G32047		AT1G53023				AT5G36220		AT4G34131
AT1G15710		AT3G55100		AT2G23190				AT5G36880		AT4G34135
AT1G18690		AT4G08160		AT3G47400				AT5G37170		AT4G34138
AT1G19310		AT4G15390		AT5G56080				AT5G37950		AT4G34640
AT1G20620		AT2G23250		AT1G62270				AT5G37970		AT4G34850
AT1G24170		AT5G47000		AT3G22720				AT5G37990		AT4G34890
AT1G30370		AT1G06090		AT3G49700				AT5G38010		AT4G35160
AT1G30910		AT1G45201		AT2G35000				AT5G38020		AT4G36220
AT1G32300		AT5G64110		AT3G29260				AT5G38100		AT4G36770
AT1G45050		AT4G22710		AT4G19970				AT5G38130		AT4G37310
AT1G48030		AT1G47390		AT4G36350				AT5G38530		AT4G37340
AT1G54150		AT3G47050		AT5G01330				AT5G38710		AT4G37360
AT1G55180		AT3G61510		AT5G09360				AT5G38780		AT4G37370
AT1G59406		AT2G25160		AT1G12170				AT5G42580		AT4G37410
AT1G65410		AT5G37950		AT1G17710				AT5G42590		AT4G37430
AT1G67490		AT5G38000		AT1G19640				AT5G42600		AT4G37760
AT1G67800		AT2G36770		AT1G56360				AT5G42800		AT4G37980
AT1G72175		AT1G64920		AT1G06080				AT5G43935		AT4G37990
AT1G73740		AT3G11325		AT1G30760				AT5G44360		AT4G39830
AT1G76150		AT4G25820		AT2G37700				AT5G44380		AT4G39950
AT2G01140		AT2G16890		AT3G07850				AT5G44390		AT5G01040
AT2G01630		AT3G48300		AT4G28420				AT5G44400		AT5G01050
AT2G05710		AT3G49110		AT5G37170				AT5G44410		AT5G01190
AT2G06050		AT3G60730		AT2G03000				AT5G44440		AT5G03490
AT2G07640		AT4G01950		AT2G30680				AT5G44620		AT5G03980
AT2G13440		AT5G17500		AT2G33070				AT5G44630		AT5G04230
AT2G17730		AT1G75920		AT5G03600				AT5G45180		AT5G04330
AT2G20690		AT4G02300		AT5G53390				AT5G45910		AT5G04370
AT2G22680		AT4G22485		AT5G54010				AT5G45950		AT5G04490
AT2G22905		AT4G24000		AT1G30710				AT5G47980		AT5G04950
AT2G30140		AT5G63560		AT1G30720				AT5G47990		AT5G05260
AT2G30970		AT1G32780		AT3G45940				AT5G48000		AT5G05600
AT2G38680		AT2G33160		AT1G30700				AT5G48010		AT5G07080
AT2G39270		AT5G14860		AT4G20800				AT5G48100		AT5G07130
AT2G39480		AT3G02620		AT5G37650				AT5G48110		AT5G07480
AT2G40790		AT5G04370		AT4G19810				AT5G48375		AT5G07990
AT2G45630		AT1G44090		AT1G74110				AT5G49690		AT5G09360
AT2G45720		AT1G64590		AT2G21730				AT5G51030		AT5G09970
AT2G47690		AT2G02000		AT5G64120				AT5G53990		AT5G10600
AT3G04080		AT2G24510		AT4G12280				AT5G54000		AT5G10610
AT3G05120		AT2G26250		AT1G07850				AT5G54010		AT5G12270
AT3G10620		AT2G47880		AT3G28610				AT5G54810		AT5G12890
AT3G14330		AT3G23060		AT2G23510				AT5G56080		AT5G13280
AT3G15350		AT3G49620		AT3G23630				AT5G57220		AT5G13930
AT3G16610		AT3G62180		AT3G59610				AT5G58910		AT5G14860
AT3G16720		AT4G25434		AT4G28780				AT5G59530		AT5G16340
AT3G17810		AT4G38420		AT1G44180				AT5G59590		AT5G16370
AT3G18850		AT5G15140		AT1G54000				AT5G61160		AT5G16390
AT3G23420		AT5G22500		AT1G58260				AT5G61290		AT5G16410
AT3G23910		AT5G37420		AT3G45480				AT5G63580		AT5G17040
AT3G28760		AT5G60250		AT1G53940				AT5G63590		AT5G17540
AT3G46790		AT4G09110		AT1G28695				AT5G63595		AT5G20960
AT3G54920		AT3G45470		AT3G46570				AT5G63600		AT5G21100
AT3G55140		AT4G19760		AT1G06990				AT5G66220		AT5G23010
AT3G55320		AT5G03810		AT2G25360				AT5G66430		AT5G23020
AT3G56550		AT1G68270		AT1G65570				AT5G66690		AT5G23050
AT3G56840		AT4G15660		AT2G44540				AT5G67310		AT5G23940
AT3G57180		AT4G37770		AT3G15830
AT3G61360		AT5G38010		AT4G38880
AT3G61810		AT1G64930		AT5G66390
AT3G63240		AT3G21950		AT1G20130
AT4G00590		AT3G29190		AT3G52810
AT4G01210		AT2G18150		AT4G33810
AT4G01660		AT4G13310		AT3G13390
AT4G01700		AT4G15400		AT3G44840
AT4G05090		AT5G54000		AT1G65340
AT4G05210		AT2G27940		AT4G38190
AT4G10100		AT2G38390		AT2G18570
AT4G10960		AT1G53023		AT1G22360
AT4G11830		AT2G23190		AT2G28630
AT4G16760		AT3G47400		AT2G43600
AT4G24805		AT5G56080		AT5G24780
AT4G27480		AT1G62270		AT5G26310
AT4G29840		AT3G22720		AT2G23260
AT4G30270		AT3G49700		AT3G30280
AT4G30310		AT2G35000		AT5G47990
AT4G30440		AT3G29260		AT1G14240
AT4G31780		AT4G19970		AT3G26270
AT4G35987		AT4G36350		AT4G19770
AT4G38460		AT5G01330		AT5G64100
AT4G39510		AT5G09360		AT1G28640
AT5G01960		AT1G12170		AT1G59950
AT5G04460		AT1G17710		AT3G27400
AT5G09600		AT1G19640		AT4G02330
AT5G13640		AT1G56360		AT5G01050
AT5G18480		AT1G06080		AT2G42990
AT5G20250		AT1G30760		AT1G54020
AT5G25265		AT2G37700		AT1G64940
AT5G27420		AT3G07850		AT1G75900
AT5G35930		AT4G28420		AT5G04500
AT5G42660		AT5G37170		AT4G32540
AT5G43430		AT2G03000		AT4G38030
AT5G47910		AT2G30680		AT5G06090
AT5G49070		AT2G33070		AT5G47980
AT5G50900		AT5G03600		AT1G05310
AT5G55630		AT5G53390		AT1G73280
AT5G56760		AT1G75890		AT3G20960
AT5G57590		AT1G01580		AT3G26760
AT5G62460		AT1G21850		AT5G37870
AT5G64570		AT1G54550		AT2G31760
AT5G65570		AT1G56550		AT3G53080
AT5G65780		AT1G69880		AT5G06730
AT2G21940		AT1G75910		AT5G37980
AT3G11040		AT3G11180		AT3G11150
AT5G63760		AT3G14040		AT5G22490
AT1G02920		AT3G16580		AT1G47620
AT1G03150		AT3G50990		AT5G04230
AT1G05680		AT5G20560		AT3G18330
AT1G06250		AT5G39890		AT4G15360
AT1G07745		AT5G48070		AT1G34520
AT1G07890		AT5G51470		AT5G35917
AT1G07910		AT5G63580		AT3G29636
AT1G08480		AT5G65690		AT3G45460
AT1G10330		AT5G54010		AT1G26420
AT1G10700		AT1G30710		AT3G27710
AT1G14430		AT1G30720		AT4G33840
AT1G20370		AT3G45940		AT1G34490
AT1G23980		AT1G30700		AT4G16230
AT1G27520		AT4G20800		AT5G44440
AT1G31740		AT5G37650		AT5G52400
AT1G32200		AT4G19810		AT2G23900
AT1G34550		AT1G74110		AT3G53280
AT1G43980		AT2G21730		AT1G54040
AT1G45976		AT5G64120		AT3G49200
AT1G48520		AT4G12280		AT4G18340
AT1G51650		AT1G07850		AT4G26200
AT1G52790		AT3G28610		AT1G28660
AT1G53770		AT2G23510		AT3G17070
AT1G59820		AT3G23630		AT1G28170
AT1G61280		AT3G59610		AT2G34790
AT1G69740		AT4G28780		AT1G79760
AT1G74040		AT1G44180		AT3G01900
AT1G78900		AT1G54000		AT5G13380
AT1G79750		AT1G58260		AT5G37940
AT2G01320		AT3G45480		AT5G03590
AT2G01720		AT1G53940		AT5G37900
AT2G01735		AT1G28695		AT5G67430
AT2G02980		AT3G46570		AT1G53990
AT2G13840		AT1G06990		AT2G47560
AT2G15620		AT2G25360		AT3G29800
AT2G17450		AT1G65570		AT3G29635
AT2G24520		AT2G44540		AT2G28850
AT2G25540		AT3G15830		AT3G26190
AT2G26135		AT4G38880		AT3G48290
AT2G27430		AT5G66390		AT4G19750
AT2G32750		AT1G20130		AT3G45540
AT2G34410		AT3G52810		AT5G37990
AT2G35420		AT4G33810		AT1G05800
AT2G36850		AT1G09350		AT1G21120
AT2G37585		AT1G22380		AT2G18140
AT2G37690		AT1G64900		AT3G47180
AT2G39000		AT1G69190		AT4G19730
AT2G40280		AT1G76290		AT4G29640
AT2G44050		AT2G21260		AT5G37970
AT2G44750		AT2G27570		AT2G21910
AT3G01580		AT3G11920		AT3G49210
AT3G02340		AT3G55190		AT1G21110
AT3G02910		AT4G03610		AT5G56490
AT3G05320		AT4G37970		AT1G32430
AT3G06510		AT5G06570		AT2G02010
AT3G06690		AT5G07000		AT5G30500
AT3G07270		AT5G17820		AT1G30350
AT3G11670		AT5G43200		AT3G17265
AT3G13900		AT5G52150		AT4G16820
AT3G15820		AT5G58390		AT1G02790
AT3G16020		AT5G58400		AT2G45220
AT3G16090		AT5G66690		AT3G24130
AT3G17000		AT3G13390		AT4G13770
AT3G21160		AT3G44840		AT1G66630
AT3G22370		AT1G65340		AT2G23590
AT3G29360		AT4G38190		AT2G36760
AT3G47530		AT2G18570		AT3G48270
AT3G47670		AT1G22360		AT5G24160
AT3G48000		AT2G28630		AT5G33370
AT3G48080		AT2G43600		AT2G30670
AT3G48410		AT5G24780		AT4G30170
AT3G49810		AT5G26310		AT5G12270
AT3G51300		AT2G23260		AT1G49430
AT3G51325		AT3G30280		AT1G50090
AT3G53510		AT5G47990		AT1G60980
AT3G57560		AT1G14240		AT1G66720
AT3G57785		AT3G26270		AT1G75620
AT3G59760		AT4G19770		AT2G25770
AT3G62660		AT5G64100		AT2G43580
AT3G63170		AT1G28640		AT4G26390
AT4G00110		AT1G59950		AT5G50600
AT4G12140		AT3G27400		AT5G51310
AT4G14430		AT4G02330		AT4G09870
AT4G14850		AT5G01050		AT4G15680
AT4G14910		AT2G42990		AT5G24960
AT4G16835		AT1G54020		AT3G10280
AT4G18030		AT1G64940		AT4G19740
AT4G21150		AT1G75900		AT1G01420
AT4G22550		AT5G04500		AT1G21530
AT4G23330		AT4G32540		AT1G35330
AT4G23730		AT4G38030		AT1G62660
AT4G28220		AT5G06090		AT2G22810
AT4G29690		AT5G47980		AT4G29610
AT4G30210		AT1G05310		AT3G55700
AT4G33565		AT1G73280		AT1G11600
AT4G33990		AT3G20960		AT1G65670
AT4G34930		AT3G26760		AT1G26390
AT4G35480		AT5G37870		AT1G22340
AT4G35530		AT2G31760		AT1G34510
AT4G38140		AT3G53080		AT2G39030
AT4G38800		AT5G06730		AT3G50740
AT5G04630		AT5G37980		AT4G09440
AT5G08530		AT3G11150		AT4G15670
AT5G10050		AT5G22490		AT1G07720
AT5G13520		AT1G28030		AT3G09260
AT5G13580		AT1G02810		AT3G48280
AT5G19020		AT1G04600		AT1G56630
AT5G19080		AT1G13430		AT2G17310
AT5G19220		AT1G20990		AT4G24650
AT5G23330		AT1G23320		AT4G26250
AT5G39050		AT1G28590		AT5G03980
AT5G47430		AT1G68180		AT5G05340
AT5G47460		AT1G70560		AT1G11770
AT5G47810		AT2G16570		AT4G30140
AT5G48450		AT2G32540		AT4G37050
AT5G48900		AT3G15870		AT5G13350
AT5G51070		AT3G17480		AT5G50700
AT5G57350		AT3G60140		AT1G06360
AT5G58050		AT4G00190		AT1G10400
AT5G58090		AT5G14180		AT1G48980
AT5G58170		AT5G17030		AT3G06460
AT5G60340		AT5G24150		AT3G14780
AT5G64300		AT5G56300		AT5G19530
AT5G64370		AT1G47620		AT1G04180
AT5G66520		AT5G04230		AT2G14710
AT3G14220		AT3G18330		AT2G43880
AT1G01090		AT4G15360		AT2G46493
AT1G02000		AT1G34520		AT2G24850
AT1G02145		AT5G35917		AT3G24220
AT1G02660		AT3G29636		AT3G44300
AT1G02860		AT3G45460		AT3G46700
AT1G02890		AT1G26420		AT3G30842
AT1G03390		AT3G27710		AT3G28380
AT1G03540		AT4G33840		AT1G34575
AT1G05010		AT1G34490		AT4G18050
AT1G05560		AT4G16230		AT1G66060
AT1G05630		AT5G44440		AT5G24950
AT1G06515		AT5G52400		AT2G07140
AT1G06520		AT2G23900		AT1G06800
AT1G07810		AT3G53280		AT4G19720
AT1G08110		AT1G54040		AT1G66000
AT1G08490		AT3G49200		AT4G10310
AT1G09400		AT4G18340		AT4G29600
AT1G11100		AT4G26200		AT1G64950
AT1G12240		AT1G28660		AT1G77780
AT1G14590		AT3G17070		AT3G29590
AT1G16480		AT1G28170		AT2G46720
AT1G16700		AT2G34790		AT3G14520
AT1G17890		AT1G79760		AT5G15110
AT1G23450		AT3G01900		AT3G32040
AT1G24360		AT5G13380		AT4G34250
AT1G27600		AT5G37940		AT2G18360
AT1G30420		AT5G03590		AT2G21890
AT1G32530		AT5G37900		AT2G30310
AT1G34200		AT5G67430		AT2G43860
AT1G44820		AT1G53990		AT3G23840
AT1G49660		AT2G47560		AT4G02320
AT1G52670		AT1G05660		AT4G15270
AT1G52750		AT1G11580		AT4G29630
AT1G52760		AT1G24470		AT4G30290
AT1G54030		AT1G28430		AT5G06720
AT1G54500		AT1G31510		AT5G41250
AT1G55850		AT1G68530		AT2G12190
AT1G57720		AT1G72590		AT2G30210
AT1G58430		AT1G73010		AT2G45970
AT1G58725		AT2G05140		AT3G26200
AT1G59870		AT2G29130		AT4G15700
AT1G60740		AT2G31690		AT4G22690
AT1G61350		AT3G01190		AT5G42580
AT1G64310		AT3G12900		AT4G02280
AT1G71020		AT3G14210		AT2G19500
AT1G71330		AT3G29410		AT3G22910
AT1G71340		AT3G57270		AT3G52970
AT1G72280		AT3G59850		AT4G19690
AT1G72330		AT3G61400		AT5G42250
AT1G72880		AT4G12270		AT1G20500
AT1G75130		AT4G18550		AT1G34540
AT1G77740		AT5G11130		AT1G68280
AT1G78010		AT5G19470		AT3G20160
AT1G78140		AT5G24070		AT3G43270
AT1G78210		AT5G26810		AT3G50760
AT1G79790		AT5G52140		AT4G39940
AT1G80300		AT5G55240		AT5G38020
AT2G01080		AT3G29800		AT5G58670
AT2G01150		AT3G29635		AT1G52700
AT2G01390		AT2G28850		AT1G66130
AT2G03880		AT3G26190		AT3G15800
AT2G16280		AT3G48290		AT3G24580
AT2G16920		AT4G19750		AT3G29680
AT2G17033		AT3G45540		AT3G53050
AT2G22450		AT5G37990		AT4G09740
AT2G27160		AT1G05800		AT5G38780
AT2G30200		AT1G21120		AT3G32030
AT2G32090		AT2G18140		AT1G26410
AT2G32760		AT3G47180		AT3G21790
AT2G33100		AT4G19730		AT3G28600
AT2G34400		AT4G29640		AT3G46500
AT2G36580		AT5G37970		AT4G00360
AT2G37280		AT2G21910		AT4G13280
AT2G38650		AT3G49210		AT3G52450
AT2G39100		AT1G21110		AT4G15500
AT2G39220		AT5G56490		AT5G48100
AT2G40600		AT1G32430		AT1G22370
AT2G41490		AT2G02010		AT2G35930
AT2G42600		AT5G30500		AT4G29620
AT2G42920		AT1G30350		AT5G20860
AT2G43080		AT3G17265		AT1G26400
AT2G43420		AT4G16820		AT1G33811
AT2G43430		AT1G02790		AT2G04020
AT2G44420		AT2G45220		AT2G23800
AT2G46390		AT3G24130		AT3G57240
AT3G01040		AT4G13770		AT5G05260
AT3G02350		AT1G66630		AT5G43760
AT3G05240		AT2G23590		AT1G15540
AT3G06140		AT2G36760		AT1G74010
AT3G06850		AT3G48270		AT2G44570
AT3G07010		AT5G24160		AT5G43890
AT3G07620		AT5G33370		AT1G12110
AT3G10870		AT2G30670		AT2G04570
AT3G14205		AT4G30170		AT4G28680
AT3G15850		AT5G12270		AT1G14540
AT3G17770		AT1G49430		AT1G24110
AT3G20200		AT1G50090		AT3G57260
AT3G20480		AT1G60980		AT1G25450
AT3G22870		AT1G66720		AT3G02610
AT3G23260		AT1G75620		AT3G14250
AT3G26130		AT2G25770		AT3G14300
AT3G26630		AT2G43580		AT1G18760
AT3G27060		AT4G26390		AT4G29740
AT3G27380		AT5G50600		AT5G51060
AT3G28860		AT5G51310		AT1G62940
AT3G29690		AT4G09870		AT3G01260
AT3G42850		AT1G04220		AT4G21200
AT3G49510		AT1G09480		AT4G37410
AT3G49740		AT1G15590		AT5G24770
AT3G54020		AT1G17000		AT5G56970
AT3G56040		AT1G51780		AT1G72520
AT3G56460		AT1G56030		AT3G55710
AT3G58730		AT1G79370		AT1G30740
AT3G59890		AT2G25150		AT3G61035
AT3G60160		AT2G37820		AT2G26450
AT3G61210		AT2G41290		AT2G28830
AT3G61490		AT2G44470		AT5G04530
AT3G62830		AT2G44810		AT1G28480
AT3G62970		AT3G12203		AT2G18190
AT3G63530		AT3G14570		AT1G34500
AT4G00900		AT4G10490		AT1G77830
AT4G01750		AT4G15870		AT2G21045
AT4G02405		AT4G29570		AT3G14510
AT4G02500		AT4G37070		AT2G23630
AT4G05160		AT5G09730		AT3G29670
AT4G08210		AT5G18930		AT3G30290
AT4G22260		AT5G43935		AT4G10750
AT4G24160		AT5G53380		AT4G37980
AT4G25650		AT5G56470		AT5G37180
AT4G26520		AT5G61160		AT1G64670
AT4G26710		AT4G15680		AT2G13680
AT4G31050		AT5G24960		AT3G29110
AT4G32250		AT3G10280		AT4G34520
AT4G33510		AT4G19740		AT1G01390
AT4G34260		AT1G01420		AT3G45080
AT4G34860		AT1G21530		AT5G16080
AT4G36810		AT1G35330		AT1G66700
AT5G02270		AT1G62660		AT1G78400
AT5G02410		AT2G22810		AT3G56350
AT5G03200		AT4G29610		AT4G28720
AT5G03770		AT3G55700		AT5G60560
AT5G04885		AT1G11600		AT1G35250
AT5G05810		AT1G65670		AT2G47870
AT5G05870		AT1G26390		AT3G17060
AT5G07640		AT1G22340		AT4G13600
AT5G10330		AT1G34510		AT5G44020
AT5G12960		AT2G39030		AT1G72000
AT5G13530		AT3G50740		AT3G28580
AT5G14130		AT4G09440		AT3G46490
AT5G15300		AT4G15670		AT3G46910
AT5G16120		AT1G07720		AT5G58660
AT5G17380		AT3G09260		AT1G11810
AT5G17600		AT3G48280		AT1G63710
AT5G18900		AT1G56630		AT3G55180
AT5G19150		AT2G17310		AT5G01310
AT5G19850		AT4G24650		AT5G13930
AT5G20500		AT4G26250		AT5G18990
AT5G26600		AT5G03980		AT5G44400
AT5G27110		AT5G05340		AT1G51210
AT5G35380		AT1G11770		AT2G14100
AT5G37410		AT4G30140		AT3G45555
AT5G37830		AT4G37050		AT5G19580
AT5G39080		AT5G13350		AT2G15370
AT5G40405		AT5G50700		AT4G37360
AT5G42650		AT1G06360		AT1G01190
AT5G45100		AT1G10400		AT1G71690
AT5G47760		AT1G48980		AT1G73300
AT5G47780		AT3G06460		AT2G23210
AT5G52100		AT3G14780		AT3G53150
AT5G54390		AT5G19530		AT2G30220
AT5G56260		AT1G04180		AT4G15490
AT5G58270		AT2G14710		AT5G36140
AT5G58410		AT2G43880		AT1G26380
AT5G61760		AT2G46493		AT1G64660
AT5G62620		AT2G24850		AT1G66650
AT5G65683		AT3G24220		AT3G51680
AT5G65720		AT3G44300		AT4G11350
AT1G17270		AT3G46700		AT2G20800
AT3G19010		AT3G59710		AT3G58970
AT3G55380		AT4G33420		AT3G59010
AT4G17590		AT5G62800		AT2G45400
AT5G02970		AT1G02950		AT2G45750
AT1G01610		AT1G05650		AT4G35160
AT1G02880		AT1G18770		AT5G05900
AT1G03030		AT1G48130		AT5G23220
AT1G03090		AT1G77650		AT5G25880
AT1G04920		AT2G19150		AT3G03530
AT1G05160		AT2G23570		AT3G48520
AT1G08730		AT2G25630		AT4G10020
AT1G08980		AT2G43620		AT1G62570
AT1G13820		AT3G04530		AT1G68470
AT1G16350		AT3G11480		AT4G18350
AT1G16570		AT3G13228		AT5G20710
AT1G20480		AT3G49630		AT5G57220
AT1G23030		AT3G56060		AT1G68850
AT1G23220		AT3G62860		AT2G07120
AT1G23260		AT4G13210		AT2G45550
AT1G26100		AT4G13700		AT3G21410
AT1G27130		AT4G17690		AT2G26420
AT1G31790		AT4G26830		AT3G21780
AT1G32415		AT4G37060		AT5G28510
AT1G32480		AT4G37400		AT5G66280
AT1G49650		AT5G04120		AT1G05250
AT1G49710		AT5G04380		AT3G44120
AT1G50510		AT5G07200		AT1G51440
AT1G51310		AT5G10100		AT2G39350
AT1G53270		AT5G11320		AT3G18320
AT1G55120		AT5G41490		AT2G15090
AT1G56345		AT5G41510		AT2G28420
AT1G59900		AT5G56075		AT2G29040
AT1G63680		AT3G30842		AT3G13784
AT1G64760		AT3G28380		AT5G04950
AT1G66980		AT1G34575		AT1G14730
AT1G68710		AT4G18050		AT1G30080
AT1G70820		AT1G66060		AT1G06120
AT1G71420		AT5G24950		AT2G44330
AT1G71750		AT2G07140		AT3G50290
AT1G72700		AT1G06800		AT5G20330
AT1G73760		AT4G19720		AT3G28980
AT1G74590		AT1G66000		AT4G11730
AT1G75020		AT4G10310		AT4G29650
AT1G75440		AT4G29600		AT2G27690
AT1G76030		AT1G64950		AT2G34990
AT1G77370		AT1G77780		AT2G46960
AT1G77490		AT3G29590		AT3G13830
AT1G78240		AT2G46720		AT1G75450
AT1G79230		AT3G14520		AT4G15690
AT1G80360		AT5G15110		AT5G38100
AT2G02390		AT3G32040		AT1G09510
AT2G11270		AT4G34250		AT1G71695
AT2G13610		AT2G18360		AT2G44460
AT2G14690		AT2G21890		AT5G16710
AT2G18640		AT2G30310		AT1G47840
AT2G20370		AT2G43860		AT3G18220
AT2G20860		AT3G23840		AT3G26780
AT2G25870		AT4G02320		AT3G44560
AT2G26230		AT4G15270		AT5G61740
AT2G26550		AT4G29630		AT1G65310
AT2G27450		AT4G30290		AT2G34490
AT2G29470		AT5G06720		AT3G26830
AT2G29560		AT5G41250		AT4G23990
AT2G30920		AT2G12190		AT2G15390
AT2G31250		AT2G30210		AT3G28510
AT2G32430		AT2G45970		AT4G12150
AT2G32440		AT3G26200		AT1G11780
AT2G34590		AT4G15700		AT2G42350
AT2G35330		AT4G22690		AT3G46170
AT2G35370		AT5G42580		AT1G05240
AT2G36980		AT4G02280		AT3G44250
AT2G37230		AT2G19500		AT4G19820
AT2G37250		AT3G22910		AT4G30280
AT2G38210		AT3G52970		AT5G18890
AT2G38220		AT4G19690		AT1G51500
AT2G38660		AT5G42250		AT2G46160
AT2G39020		AT1G20500		AT4G09100
AT2G40770		AT1G34540		AT5G01040
AT2G42310		AT1G68280		AT1G80820
AT2G42490		AT3G20160		AT1G19570
AT2G43090		AT3G43270		AT3G42960
AT2G44880		AT3G50760		AT4G22720
AT2G45530		AT4G39940		AT5G01320
AT2G45610		AT5G38020		AT3G29250
AT2G46370		AT5G58670		AT1G44542
AT2G46950		AT1G52700		AT5G42440
AT2G47510		AT1G66130		AT3G07820
AT3G01850		AT3G15800		AT4G13490
AT3G03310		AT3G24580		AT1G18780
AT3G03900		AT3G29680		AT1G52680
AT3G05340		AT3G53050		AT1G63140
AT3G07370		AT4G09740		AT1G66860
AT3G07720		AT5G38780		AT2G19670
AT3G08900		AT1G09890		AT3G09270
AT3G10740		AT1G23730		AT3G62240
AT3G10840		AT1G25410		AT4G14940
AT3G11240		AT1G37130		AT5G67400
AT3G13080		AT1G56430		AT1G32350
AT3G13682		AT1G75880		AT2G47120
AT3G13800		AT1G78500		AT4G12190
AT3G15090		AT2G02770		AT5G19040
AT3G15120		AT2G23960		AT3G11050
AT3G19280		AT2G30090		AT5G63450
AT3G19480		AT2G43590		AT3G48320
AT3G20330		AT2G43870		AT3G06440
AT3G21130		AT3G12500		AT5G38280
AT3G22890		AT3G13640		AT5G16340
AT3G23490		AT3G19160		AT2G30770
AT3G25210		AT3G22650		AT2G37040
AT3G26650		AT3G28250		AT5G09700
AT3G27330		AT3G49190		AT2G47140
AT3G27740		AT3G52780		AT1G71170
AT3G44190		AT3G53075		AT5G60510
AT3G44510		AT3G62960		AT1G80330
AT3G44620		AT4G16590		AT5G28237
AT3G46620		AT4G21690		AT5G23940
AT3G47450		AT4G36380		AT3G57140
AT3G47540		AT5G07430		AT5G38710
AT3G47800		AT5G17720		AT1G14250
AT3G47930		AT5G22420		AT2G14920
AT3G48870		AT5G25620		AT4G14440
AT3G51290		AT5G26140		AT5G37200
AT3G52930		AT5G39910		AT4G18990
AT3G53900		AT5G45180		AT4G32375
AT3G54900		AT5G63750		AT4G37520
AT3G55040		AT3G32030		AT1G68620
AT3G58180		AT1G26410		AT2G30750
AT3G58720		AT3G21790		AT2G35990
AT3G60050		AT3G28600		AT4G34180
AT4G00570		AT3G46500		AT5G25820
AT4G08900		AT4G00360		AT1G62560
AT4G09560		AT4G13280		AT2G39640
AT4G13650		AT3G52450		AT3G22400
AT4G15200		AT4G15500		AT4G10160
AT4G15236		AT5G48100		AT4G15765
AT4G15480		AT1G22370		AT4G24010
AT4G17410		AT2G35930		AT5G05910
AT4G18240		AT4G29620		AT5G35715
AT4G19220		AT5G20860		AT2G43050
AT4G20160		AT1G26400		AT4G01770
AT4G24380		AT1G33811		AT4G36220
AT4G26510		AT2G04020		AT5G59590
AT4G29490		AT2G23800		AT1G02050
AT4G32450		AT3G57240		AT1G61680
AT4G33170		AT5G05260		AT1G35290
AT4G34100		AT5G43760		AT3G21750
AT4G36890		AT1G15540		AT3G05610
AT4G38310		AT1G74010		AT4G13510
AT5G01160		AT2G44570		AT5G36190
AT5G01650		AT5G43890		AT2G19410
AT5G03450		AT1G12110		AT3G18660
AT5G03455		AT2G04570		AT4G08770
AT5G07390		AT4G28680		AT1G10270
AT5G08690		AT1G14540		AT1G13210
AT5G13440		AT1G24110		AT1G17420
AT5G13450		AT3G57260		AT3G26150
AT5G14430		AT1G25450		AT4G16260
AT5G16510		AT3G02610		AT5G63570
AT5G17000		AT3G14250		AT1G03495
AT5G18650		AT3G14300		AT3G51070
AT5G19180		AT1G18760		AT4G34215
AT5G22460		AT4G29740		AT5G40000
AT5G23630		AT5G51060		AT1G32910
AT5G37250		AT1G62940		AT1G66690
AT5G37400		AT3G01260		AT2G14620
AT5G37510		AT4G21200		AT3G23460
AT5G39980		AT4G37410		AT3G45070
AT5G40010		AT5G24770		AT4G29270
AT5G40250		AT5G56970		AT1G67330
AT5G41670		AT1G72520		AT4G18970
AT5G43900		AT1G21540		AT4G23100
AT5G43910		AT1G01670		AT4G15960
AT5G46290		AT1G09240		AT1G47480
AT5G49555		AT1G09500		AT1G52800
AT5G51020		AT1G29670		AT1G18140
AT5G52810		AT1G35910		AT1G56680
AT5G54690		AT1G47990		AT2G32530
AT5G57170		AT1G61820		AT1G66030
AT5G60600		AT1G68460		AT1G69240
AT5G61580		AT1G70250		AT2G27680
AT5G62575		AT1G80340		AT3G16555
AT5G63010		AT2G23540		AT4G25090
AT5G64940		AT2G47050		AT4G39640
AT5G66040		AT2G47280		AT5G27380
AT5G66120		AT3G04290		AT5G55120
AT5G66550		AT3G19710		AT1G22510
AT5G66920		AT3G20690		AT1G79870
AT5G67230		AT3G28570		AT2G27000
AT1G28710		AT3G48700		AT2G38590
AT3G25970		AT3G51420		AT2G41480
AT1G08270		AT4G17920		AT2G47150
AT1G08310		AT4G19680		AT3G53305
AT1G09640		AT4G22530		AT4G28370
AT1G10670		AT4G24430		AT2G18800
AT1G12760		AT4G39770		AT3G26280
AT1G13560		AT5G07010		AT4G20960
AT1G15165		AT5G17730		AT3G28540
AT1G15490		AT5G20310		AT2G38230
AT1G17170		AT5G20340		AT5G42100
AT1G17540		AT5G24090		AT1G01120
AT1G18470		AT5G49180		AT1G69940
AT1G19690		AT5G57750		AT5G36180
AT1G20050		AT5G63180		AT3G25060
AT1G21350		AT5G66430		AT3G52960
AT1G23330		AT3G55710		AT2G44040
AT1G26130		AT1G30740		AT3G06470
AT1G26270		AT3G61035		AT3G50300
AT1G27450		AT2G26450		AT3G61550
AT1G32210		AT2G28830		AT5G52320
AT1G32740		AT5G04530		AT1G69640
AT1G32900		AT1G28480		AT4G29120
AT1G33430		AT2G18190		AT2G24580
AT1G34130		AT1G34500		AT2G29390
AT1G44170		AT1G77830		AT3G01910
AT1G49340		AT2G21045		AT3G13790
AT1G49640		AT3G14510		AT3G21230
AT1G50450		AT2G23630		AT4G01480
AT1G52340		AT3G29670		AT1G21960
AT1G53290		AT3G30290		AT2G22930
AT1G53780		AT4G10750		AT3G21460
AT1G56190		AT4G37980		AT5G08670
AT1G59171		AT5G37180		AT5G37930
AT1G60000		AT1G64670		AT1G20510
AT1G63840		AT2G13680		AT2G31990
AT1G64460		AT3G29110		AT5G17990
AT1G65820		AT4G34520		AT1G09490
AT1G68930		AT1G01390		AT2G27950
AT1G71990		AT3G45080		AT2G23400
AT1G73650		AT5G16080		AT4G29700
AT1G74420		AT1G66700		AT4G39490
AT1G75210		AT1G78400		AT5G06530
AT1G75680		AT3G56350		AT5G10600
AT1G78570		AT4G28720		AT5G17200
AT2G01730		AT5G60560		AT5G44170
AT2G02720		AT1G35250		AT1G12050
AT2G03760		AT2G47870		AT1G45145
AT2G03770		AT3G17060		AT1G51460
AT2G04700		AT4G13600		AT1G62540
AT2G11810		AT5G44020		AT1G63460
AT2G15580		AT1G72000		AT2G15360
AT2G16370		AT3G28580		AT2G33980
AT2G17700		AT3G46490		AT3G48720
AT2G20900		AT3G46910		AT4G23420
AT2G23180		AT5G58660		AT5G52630
AT2G24220		AT1G11810		AT1G68260
AT2G24370		AT1G63710		AT2G23410
AT2G26100		AT3G55180		AT3G51171
AT2G27500		AT5G01310		AT5G02750
AT2G27730		AT5G13930		AT5G07990
AT2G28080		AT5G18990		AT1G30870
AT2G28920		AT5G44400		AT4G09130
AT2G31350		AT1G77790		AT3G10720
AT2G32020		AT1G02460		AT5G03490
AT2G35040		AT1G12190		AT4G38220
AT2G37210		AT1G13420		AT1G59960
AT2G38050		AT1G14100		AT3G16340
AT2G38270		AT1G17300		AT5G48440
AT2G38280		AT1G23240		AT1G62810
AT2G39140		AT1G24480		AT5G04330
AT2G39630		AT1G32100		AT5G38970
AT2G41980		AT1G48820		AT1G12550
AT2G42070		AT1G66852		AT3G59140
AT2G46030		AT1G67455		AT4G15440
AT3G02360		AT1G68040		AT5G55180
AT3G02870		AT2G01800		AT1G21130
AT3G03690		AT2G18130		AT1G64550
AT3G05170		AT2G18620		AT4G22100
AT3G05250		AT2G19610		AT4G33940
AT3G05510		AT2G25500		AT4G38590
AT3G05530		AT2G29750		AT4G39952
AT3G06050		AT2G33655		AT5G60500
AT3G07020		AT2G43570		AT1G65580
AT3G07400		AT2G43670		AT2G23520
AT3G11773		AT3G18340		AT2G26560
AT3G12290		AT3G22710		AT3G11170
AT3G13930		AT3G26115		AT4G16450
AT3G14075		AT3G26320		AT1G22210
AT3G17710		AT4G25150		AT1G77150
AT3G19960		AT4G35150		AT1G80230
AT3G20020		AT4G35820		AT2G27010
AT3G20790		AT4G39010		AT3G13770
AT3G22880		AT5G15950		AT3G43430
AT3G23685		AT5G20390		AT3G53090
AT3G24030		AT5G24410		AT4G13840
AT3G24330		AT5G37430		AT5G08470
AT3G24340		AT5G38120		AT5G60790
AT3G26125		AT5G43300		AT1G67290
AT3G28480		AT5G50750		AT2G04920
AT3G29230		AT1G51210		AT2G42670
AT3G45630		AT2G14100		AT3G14790
AT3G46440		AT3G45555		AT3G47160
AT3G47000		AT5G19580		AT4G13080
AT3G47360		AT2G15370		AT5G07410
AT3G47550		AT4G37360		AT3G14580
AT3G48070		AT1G01190		AT3G42830
AT3G48190		AT1G71690		AT4G08040
AT3G48680		AT1G73300		AT3G28520
AT3G48820		AT2G23210		AT5G28960
AT3G53100		AT3G53150		AT3G27720
AT3G53520		AT2G30220		AT3G32980
AT3G57170		AT4G15490		AT2G33750
AT3G58610		AT5G36140		AT3G29630
AT3G60750		AT1G26380		AT5G38130
AT3G60966		AT1G64660		AT3G19895
AT3G61010		AT1G66650		AT5G06340
AT3G61180		AT3G51680		AT1G10560
AT4G02580		AT4G11350		AT4G10500
AT4G02750		AT2G20800		AT2G25410
AT4G04880		AT3G58970		AT4G36250
AT4G07960		AT3G59010		AT1G21100
AT4G08170		AT2G45400		AT1G65520
AT4G09090		AT2G45750		AT1G72200
AT4G09510		AT4G35160		AT3G43670
AT4G09630		AT5G05900		AT4G29590
AT4G11840		AT5G23220		AT5G04310
AT4G11980		AT5G25880		AT3G14050
AT4G12720		AT3G03530		AT1G78370
AT4G13050		AT3G48520		AT3G03540
AT4G13100		AT4G10020		AT3G46510
AT4G16070		AT1G62570		AT1G78360
AT4G16570		AT1G68470		AT3G09920
AT4G16765		AT4G18350		AT3G14970
AT4G19191		AT5G20710		AT3G51000
AT4G20150		AT5G57220		AT5G05130
AT4G21350		AT1G68850		AT1G11530
AT4G23820		AT2G07120		AT1G60490
AT4G25100		AT2G45550		AT1G69720
AT4G29360		AT3G21410		AT1G76410
AT4G30000		AT1G77530		AT2G18193
AT4G31196		AT1G17190		AT2G19900
AT4G32120		AT1G19230		AT2G41380
AT4G33180		AT1G19940		AT3G26782
AT4G37890		AT1G22500		AT3G45510
AT4G38150		AT1G26360		AT3G49170
AT5G05530		AT1G28040		AT3G51820
AT5G06540		AT1G48660		AT5G44380
AT5G06690		AT1G51930		AT5G57440
AT5G07360		AT1G58300		AT1G34060
AT5G07370		AT1G67450		AT2G13560
AT5G08170		AT1G69930		AT2G29480
AT5G08740		AT1G74000		AT3G13550
AT5G09930		AT1G80140		AT4G02290
AT5G10830		AT2G24800		AT4G15110
AT5G11110		AT2G39410		AT5G01190
AT5G11650		AT4G04080		AT5G21930
AT5G11910		AT4G05350		AT5G42180
AT5G13370		AT4G26485		AT1G06130
AT5G13980		AT4G26740		AT1G59730
AT5G14450		AT5G14400		AT2G26400
AT5G14850		AT5G20570		AT2G28100
AT5G14980		AT5G22300		AT2G34000
AT5G16760		AT5G23790		AT2G36970
AT5G18070		AT5G37280		AT3G22350
AT5G18630		AT5G42800		AT3G23470
AT5G19840		AT5G45960		AT3G47390
AT5G20060		AT5G50160		AT4G15975
AT5G20260		AT5G54400		AT4G15260
AT5G20910		AT5G66220		AT5G34780
AT5G20980		AT5G66230		AT5G13800
AT5G23440		AT2G26420		AT1G30860
AT5G26180		AT3G21780		AT2G03010
AT5G27730		AT5G28510		AT1G23740
AT5G28310		AT5G66280		AT1G53840
AT5G34850		AT1G05250		AT3G55310
AT5G36890		AT3G44120		AT4G11640
AT5G38630		AT1G51440		AT1G24430
AT5G41890		AT2G39350		AT1G29660
AT5G43280		AT3G18320		AT2G37790
AT5G46210		AT2G15090		AT3G21560
AT5G47050		AT2G28420		AT3G26160
AT5G49665		AT2G29040		AT3G55090
AT5G51890		AT3G13784		AT4G33820
AT5G53010		AT5G04950		AT4G37160
AT5G53580		AT1G14730		AT4G39660
AT5G54570		AT1G30080		AT5G37230
AT5G55130		AT1G06120		AT5G38460
AT5G55360		AT2G44330		AT1G11090
AT5G56720		AT3G50290		AT1G76130
AT5G57035		AT5G20330		AT2G22530
AT5G57040		AT3G28980		AT3G55940
AT5G58330		AT4G11730		AT4G20050
AT5G61130		AT4G29650		AT5G05600
AT5G62790		AT2G27690		AT5G25180
AT5G63800		AT2G34990		AT5G59600
AT5G64380		AT2G46960		AT1G05590
AT5G64813		AT3G13830		AT1G25230
AT2G24560		AT1G75450		AT2G18560
AT2G35650		AT4G15690		AT2G45560
AT3G03580		AT5G38100		AT3G56820
AT5G01670		AT1G09510		AT2G45440
AT5G60170		AT1G71695		AT3G25770
AT5G65940		AT2G44460		AT4G21210
AT1G02640		AT5G16710		AT4G37870
AT1G04290		AT1G47840		AT5G03860
AT1G04790		AT3G18220		AT5G25130
AT1G05620		AT3G26780		AT5G28020
AT1G05675		AT3G44560		AT1G19540
AT1G05790		AT5G61740		AT1G48700
AT1G05880		AT1G65310		AT1G51990
AT1G06490		AT2G34490		AT1G59700
AT1G06680		AT3G26830		AT2G03550
AT1G06730		AT4G23990		AT2G46890
AT1G08200		AT3G25050		AT5G12940
AT1G08470		AT1G12740		AT3G43190
AT1G08520		AT1G14130		AT3G60961
AT1G08940		AT1G15550		AT3G55650
AT1G09195		AT1G16980		AT3G26170
AT1G09430		AT1G18310		AT4G32210
AT1G10370		AT1G32170		AT2G46500
AT1G10740		AT1G58370		AT2G42360
AT1G11290		AT1G64060		AT3G21760
AT1G11790		AT1G65060		AT5G54810
AT1G12640		AT2G21610		AT1G60190
AT1G14080		AT2G27520		AT3G62720
AT1G14185		AT2G30840		AT1G34040
AT1G14230		AT2G30933		AT2G39720
AT1G15020		AT3G05620		AT5G62220
AT1G16720		AT3G13730		AT1G09940
AT1G17650		AT3G17270		AT1G17430
AT1G18180		AT3G20700		AT1G45191
AT1G18500		AT3G44990		AT4G15240
AT1G19440		AT3G52330		AT4G34390
AT1G22800		AT3G52600		AT1G63900
AT1G24280		AT3G53070		AT2G31550
AT1G24340		AT3G62950		AT3G15930
AT1G26810		AT3G63110		AT4G02340
AT1G26900		AT4G10190		AT4G08870
AT1G27910		AT4G23020		AT4G37640
AT1G29810		AT5G08100		AT5G51920
AT1G31160		AT5G09910		AT3G12800
AT1G31220		AT5G21950		AT4G01690
AT1G32180		AT5G41900		AT4G15760
AT1G34260		AT5G45950		AT5G11610
AT1G35625		AT5G53910		AT1G15210
AT1G36280		AT2G15390		AT1G58080
AT1G36340		AT3G28510		AT2G36700
AT1G37150		AT4G12150		AT4G37380
AT1G43100		AT1G11780		AT5G15050
AT1G44000		AT2G42350		AT1G22400
AT1G44010		AT3G46170		AT2G28190
AT1G47260		AT1G05240		AT3G16880
AT1G48320		AT3G44250		AT1G06290
AT1G48430		AT4G19820		AT1G48690
AT1G49850		AT4G30280		AT1G55670
AT1G53280		AT5G18890		AT1G78955
AT1G55810		AT1G51500		AT2G32740
AT1G60890		AT2G46160		AT2G35910
AT1G62130		AT4G09100		AT3G24360
AT1G62960		AT5G01040		AT4G26400
AT1G63270		AT1G80820		AT5G04040
AT1G63290		AT1G19570		AT5G14930
AT1G65930		AT3G42960		AT5G23230
AT1G65980		AT4G22720		AT1G13140
AT1G67280		AT5G01320		AT2G38060
AT1G68560		AT3G29250		AT3G08820
AT1G69295		AT1G44542		AT3G54440
AT1G69820		AT5G42440		AT4G02480
AT1G70760		AT3G07820		AT4G10230
AT1G71070		AT4G13490		AT4G30300
AT1G71250		AT1G18780		AT4G37370
AT1G71490		AT1G52680		AT5G07270
AT1G71697		AT1G63140		AT5G11550
AT1G72040		AT1G66860		AT5G15180
AT1G72190		AT2G19670		AT5G21060
AT1G73340		AT3G09270		AT5G37460
AT1G74030		AT3G62240		AT5G60820
AT1G74600		AT4G14940		AT5G62840
AT1G76690		AT5G67400		AT5G67310
AT1G78660		AT1G32350		AT1G02940
AT1G78920		AT2G47120		AT1G21430
AT1G79010		AT4G12190		AT1G21440
AT1G80380		AT5G19040		AT1G55740
AT1G80460		AT3G11050		AT2G44350
AT2G01270		AT5G63450		AT3G30460
AT2G02050		AT3G15290		AT3G49160
AT2G03210		AT1G49860		AT3G58790
AT2G04430		AT1G60090		AT5G37270
AT2G04540		AT1G66870		AT5G45900
AT2G05790		AT1G67750		AT5G52190
AT2G11200		AT1G71880		AT1G35183
AT2G11890		AT1G73610		AT1G71920
AT2G15690		AT2G25130		AT1G73290
AT2G17420		AT2G34810		AT2G43820
AT2G19490		AT2G36325		AT3G24230
AT2G21170		AT2G41473		AT3G24670
AT2G22190		AT3G03480		AT3G27240
AT2G23600		AT3G05300		AT4G10030
AT2G23610		AT3G11340		AT4G33870
AT2G23780		AT3G17720		AT5G43780
AT2G26640		AT3G19270		AT5G36220
AT2G27190		AT3G53065		AT1G58936
AT2G27820		AT4G04930		AT1G66660
AT2G28755		AT4G11600		AT2G36790
AT2G30575		AT4G26820		AT3G28340
AT2G30870		AT4G35640		AT4G34480
AT2G31540		AT5G03260		AT5G21105
AT2G33220		AT5G12420		AT1G17020
AT2G34060		AT5G24420		AT3G01200
AT2G35450		AT5G42460		AT5G20960
AT2G35520		AT3G48320		AT1G17160
AT2G35610		AT3G06440		AT2G07560
AT2G37580		AT5G38280		AT3G14550
AT2G37760		AT5G16340		AT5G45910
AT2G37940		AT2G30770		AT1G41830
AT2G38010		AT2G37040		AT1G56000
AT2G40116		AT5G09700		AT4G13410
AT2G40300		AT2G47140		AT4G16490
AT2G45670		AT1G71170		AT4G24520
AT2G46820		AT5G60510		AT5G17540
AT2G46930		AT1G80330		AT5G44390
AT2G47240		AT5G28237		AT5G53990
AT2G47380		AT5G23940		AT1G52940
AT2G47760		AT3G57140		AT3G45770
AT3G01440		AT5G38710		AT4G22580
AT3G02090		AT1G14250		AT1G20780
AT3G03080		AT2G14920		AT1G23360
AT3G03405		AT4G14440		AT2G32030
AT3G04790		AT5G37200		AT3G47010
AT3G06200		AT4G18990		AT5G38360
AT3G06580		AT4G32375		AT1G28690
AT3G06810		AT4G37520		AT1G65486
AT3G08560		AT1G68620		AT3G10140
AT3G08750		AT2G30750		AT5G01930
AT3G08840		AT2G35990		AT5G10560
AT3G09770		AT4G34180		AT5G65685
AT3G09810		AT5G25820		AT1G73310
AT3G10550		AT1G62560		AT2G15260
AT3G10630		AT2G39640		AT3G07330
AT3G10850		AT3G22400		AT3G18970
AT3G11945		AT4G10160		AT3G21500
AT3G12260		AT4G15765		AT3G43750
AT3G12270		AT4G24010		AT4G08780
AT3G13560		AT5G05910		AT4G25720
AT3G13680		AT5G35715		AT4G30550
AT3G14225		AT2G43050		AT4G37840
AT3G14310		AT4G01770		AT5G44410
AT3G16480		AT4G36220		AT1G22650
AT3G16700		AT5G59590		AT1G33800
AT3G17940		AT1G02050		AT1G44970
AT3G17970		AT1G61680		AT1G54340
AT3G18710		AT1G06820		AT2G28800
AT3G18980		AT1G57590		AT3G25760
AT3G19140		AT1G02310		AT3G25780
AT3G19910		AT1G12010		AT3G25960
AT3G21070		AT1G20120		AT3G27890
AT3G23330		AT1G20132		AT5G22810
AT3G23510		AT1G22710		AT1G26800
AT3G23530		AT1G48910		AT1G44980
AT3G23600		AT1G57820		AT1G56560
AT3G25030		AT1G60470		AT1G64680
AT3G27980		AT1G65210		AT1G71480
AT3G28180		AT1G70910		AT2G23140
AT3G28530		AT1G72810		AT2G26000
AT3G28640		AT2G26130		AT2G27510
AT3G42640		AT2G27760		AT3G15660
AT3G45100		AT2G29370		AT3G27320
AT3G46460		AT2G37440		AT3G51610
AT3G48780		AT2G43660		AT5G14310
AT3G50940		AT3G01010		AT5G22410
AT3G52160		AT3G06260		AT5G39090
AT3G53180		AT3G10815		AT1G32860
AT3G53480		AT3G19880		AT1G76490
AT3G55800		AT3G28620		AT3G05970
AT3G55830		AT3G28740		AT4G08390
AT3G56490		AT3G54150		AT5G24810
AT3G57550		AT3G62690		AT3G14530
AT3G62040		AT4G10260		AT1G19170
AT3G62150		AT4G21000		AT5G19290
AT3G62790		AT4G26280		AT1G77170
AT3G63080		AT4G32870		AT3G48950
AT3G63370		AT5G14070		AT3G61200
AT4G01850		AT5G17760		AT4G38600
AT4G03340		AT5G25120		AT1G01980
AT4G03510		AT5G62830		AT3G15070
AT4G04370		AT1G35290		AT3G21240
AT4G05020		AT3G21750		AT1G68760
AT4G05390		AT3G05610		AT3G18270
AT4G09020		AT4G13510		AT3G25660
AT4G13180		AT5G36190		AT4G36750
AT4G14680		AT2G19410		AT5G55370
AT4G15550		AT3G18660		AT1G19920
AT4G17905		AT4G08770		AT1G23010
AT4G18010		AT1G10270		AT1G61620
AT4G21220		AT1G13210		AT2G23420
AT4G21540		AT1G17420		AT3G47290
AT4G22250		AT3G26150		AT5G15650
AT4G22305		AT4G16260		AT5G50870
AT4G23490		AT5G63570		AT1G08065
AT4G23895		AT1G03495		AT2G18450
AT4G24730		AT3G51070		AT2G21860
AT4G24830		AT4G34215		AT2G35010
AT4G25290		AT5G40000		AT2G35100
AT4G25570		AT1G32910		AT3G21360
AT4G25750		AT1G66690		AT3G51160
AT4G25835		AT2G14620		AT4G35070
AT4G25970		AT3G23460		AT1G01480
AT4G25980		AT3G45070		AT1G17340
AT4G26580		AT4G29270		AT1G42970
AT4G26970		AT1G67330		AT1G60140
AT4G28005		AT4G18970		AT3G21250
AT4G28070		AT4G23100		AT4G03965
AT4G28706		AT4G15960		AT5G39550
AT4G29720		AT1G47480		AT5G65110
AT4G29890		AT1G52800		AT1G65610
AT4G30340		AT1G18140		AT2G20830
AT4G30950		AT1G56680		AT2G29350
AT4G31140		AT2G32530		AT2G37360
AT4G31990		AT1G66030		AT3G10710
AT4G33580		AT1G69240		AT3G27190
AT4G33910		AT2G27680		AT3G55290
AT4G34920		AT3G16555		AT4G09650
AT4G35770		AT4G25090		AT5G14950
AT4G36530		AT4G39640		AT5G60620
AT4G36550		AT5G27380
AT4G37500		AT5G55120
AT5G02230		AT1G22510
AT5G02310		AT1G79870
AT5G03180		AT2G27000
AT5G04060		AT2G38590
AT5G04610		AT2G41480
AT5G04620		AT2G47150
AT5G04930		AT3G53305
AT5G05580		AT4G28370
AT5G05860		AT2G18800
AT5G05880		AT3G26280
AT5G06050		AT1G06620
AT5G08415		AT3G02630
AT5G09230		AT3G21770
AT5G09870		AT1G02550
AT5G10730		AT1G18360
AT5G12200		AT1G30530
AT5G13690		AT1G48140
AT5G14420		AT1G48670
AT5G14470		AT1G49220
AT5G14800		AT1G74620
AT5G15400		AT2G21790
AT5G16970		AT2G22590
AT5G17520		AT2G25260
AT5G18320		AT2G32160
AT5G18340		AT2G40690
AT5G19460		AT3G07970
AT5G19990		AT3G14820
AT5G20070		AT3G17205
AT5G20280		AT3G17280
AT5G20990		AT3G21090
AT5G22000		AT3G21730
AT5G23310		AT3G25090
AT5G32470		AT3G27950
AT5G37560		AT3G51030
AT5G39680		AT3G63200
AT5G40650		AT4G05430
AT5G41130		AT4G25160
AT5G41700		AT5G06490
AT5G41870		AT5G06580
AT5G42940		AT5G08370
AT5G44280		AT5G18430
AT5G45300		AT5G42200
AT5G47400		AT5G51030
AT5G47650		AT5G61290
AT5G49360		AT4G20960
AT5G49730		AT3G28540
AT5G50420		AT2G38230
AT5G53540		AT5G42100
AT5G55720		AT1G01120
AT5G57740		AT1G69940
AT5G57850		AT5G36180
AT5G58220		AT3G25060
AT5G58290		AT3G52960
AT5G59290		AT2G44040
AT5G60335		AT3G06470
AT5G60710		AT3G50300
AT5G61250		AT3G61550
AT5G61310		AT5G52320
AT5G61840		AT1G69640
AT5G62030		AT4G29120
AT5G63770		AT2G24580
AT5G66950		AT2G29390
AT5G67520		AT3G01910
AT3G55530		AT3G13790
AT5G55380		AT3G21230
AT1G09340		AT4G01480
AT1G09390		AT1G21960
AT1G09410		AT2G22930
AT1G09420		AT3G21460
AT1G11020		AT5G08670
AT1G13280		AT5G37930
AT1G14688		AT1G20510
AT1G15410		AT2G31990
AT1G17410		AT5G17990
AT1G17840		AT1G09490
AT1G18270		AT2G27950
AT1G18580		AT2G23400
AT1G22880		AT4G29700
AT1G26220		AT4G39490
AT1G26640		AT5G06530
AT1G28240		AT5G10600
AT1G29840		AT5G17200
AT1G47570		AT5G44170
AT1G48850		AT1G12050
AT1G48930		AT1G45145
AT1G49820		AT1G51460
AT1G50460		AT1G62540
AT1G50780		AT1G63460
AT1G53390		AT2G15360
AT1G53520		AT2G33980
AT1G55530		AT3G48720
AT1G56670		AT4G23420
AT1G60440		AT5G52630
AT1G63970		AT1G68260
AT1G64190		AT2G23410
AT1G64400		AT3G51171
AT1G67550		AT5G02750
AT1G74400		AT5G07990
AT1G74910		AT4G30540
AT1G76050		AT1G03020
AT1G76080		AT1G12130
AT1G77420		AT1G20135
AT2G02500		AT1G34270
AT2G02750		AT1G47510
AT2G02760		AT1G56600
AT2G03140		AT1G59670
AT2G17720		AT1G63440
AT2G18250		AT1G66110
AT2G20680		AT1G66800
AT2G21530		AT1G77760
AT2G30860		AT2G16740
AT2G35170		AT2G22960
AT2G43910		AT2G24820
AT2G46090		AT2G38500
AT2G47090		AT2G41700
AT3G01400		AT2G48150
AT3G03330		AT3G11110
AT3G05630		AT3G15940
AT3G06300		AT3G22560
AT3G06860		AT3G61410
AT3G11630		AT4G01190
AT3G12770		AT4G09750
AT3G13030		AT4G16270
AT3G13090		AT4G16690
AT3G14270		AT4G17680
AT3G14930		AT4G25950
AT3G15720		AT4G33120
AT3G16785		AT4G37580
AT3G18030		AT4G38010
AT3G18290		AT5G03610
AT3G22425		AT5G07040
AT3G26840		AT5G11930
AT3G28490		AT5G15490
AT3G30841		AT5G16290
AT3G42050		AT5G43330
AT3G47520		AT5G51950
AT3G47560		AT5G55330
AT3G47630		AT5G56640
AT3G47790		AT5G65730
AT3G49050		AT1G30870
AT3G50400		AT4G09130
AT3G52990		AT3G10720
AT3G53140		AT5G03490
AT3G53580		AT4G38220
AT3G55260		AT1G59960
AT3G55360		AT3G16340
AT3G57520		AT5G48440
AT3G57760		AT1G62810
AT3G60180		AT5G04330
AT3G60620		AT5G38970
AT3G61130		AT1G12550
AT3G63440		AT3G59140
AT3G66658		AT4G15440
AT4G00600		AT5G55180
AT4G03000		AT1G21130
AT4G04040		AT1G64550
AT4G08790		AT4G22100
AT4G10040		AT4G33940
AT4G12440		AT4G38590
AT4G12570		AT4G39952
AT4G13360		AT5G60500
AT4G13930		AT1G65580
AT4G15233		AT2G23520
AT4G16700		AT2G26560
AT4G16710		AT3G11170
AT4G17090		AT4G16450
AT4G19985		AT1G22210
AT4G22330		AT1G77150
AT4G24510		AT1G80230
AT4G25840		AT2G27010
AT4G27550		AT3G13770
AT4G30490		AT3G43430
AT4G31590		AT3G53090
AT4G32360		AT4G13840
AT4G37100		AT5G08470
AT4G37550		AT5G60790
AT4G37830		AT1G67290
AT5G04750		AT2G04920
AT5G05890		AT2G42670
AT5G08300		AT3G14790
AT5G10690		AT3G47160
AT5G11920		AT4G13080
AT5G15530		AT5G07410
AT5G16400		AT3G14580
AT5G16960		AT3G42830
AT5G16980		AT1G06100
AT5G17530		AT1G77100
AT5G18170		AT4G13660
AT5G19200		AT1G01680
AT5G23070		AT1G04580
AT5G23450		AT1G13440
AT5G27540		AT1G24735
AT5G38070		AT1G31170
AT5G53360		AT1G33220
AT5G55070		AT1G48740
AT5G58240		AT1G53025
AT5G58250		AT1G53670
AT5G58480		AT1G55250
AT5G59200		AT1G70080
AT5G59440		AT1G77520
AT5G61560		AT2G20360
AT5G62630		AT2G37540
AT5G63890		AT3G48560
AT5G65165		AT3G54270
AT5G66170		AT3G60100
AT5G67530		AT4G08550
AT5G67540		AT4G11911
AT3G28390		AT4G15210
AT3G30842		AT4G24050
AT3G28360		AT4G26270
AT3G43190		AT4G30250
AT3G28380		AT4G35810
AT3G28415		AT4G37950
AT4G15290		AT5G02890
AT4G15980		AT5G03800
AT4G15320		AT5G07225
AT5G26150		AT5G16230
AT4G09120		AT5G17050
AT5G04970		AT5G20550
AT3G29800		AT5G21140
AT3G60961		AT5G28030
AT2G28780		AT5G37690
AT3G44830		AT5G38530
AT3G13390		AT5G43940
AT1G47620		AT5G45970
AT3G55650		AT5G53110
AT3G43860		AT5G53600
AT3G29430		AT5G56060
AT5G17740		AT4G08040
AT2G26420		AT3G28520
AT3G45810		AT5G28960
AT3G24290		AT3G27720
AT1G10680		AT3G32980
AT4G09110		AT2G33750
AT1G30870		AT3G29630
AT5G43780		AT5G38130
AT3G01420		AT3G19895
AT5G03820		AT5G06340
AT5G04960		AT1G10560
AT5G46540		AT4G10500
AT2G46740		AT2G25410
AT3G47040		AT4G36250
AT4G18050		AT1G21100
AT2G15390		AT1G65520
AT5G34780		AT1G72200
AT4G22080		AT3G43670
AT1G31710		AT4G29590
AT3G45940		AT5G04310
AT3G55710		AT3G14050
AT4G20960		AT1G78370
AT4G09130		AT3G03540
AT4G08040		AT3G46510
AT2G46750		AT1G78360
AT4G19380		AT3G09920
AT1G59500		AT3G14970
AT3G47190		AT3G51000
AT3G44540		AT5G05130
AT5G25370		AT1G11530
AT5G27870		AT1G60490
AT3G55100		AT1G69720
AT4G08160		AT1G76410
AT1G65340		AT2G18193
AT3G18330		AT2G19900
AT4G15680		AT2G41380
AT1G66060		AT3G26782
AT3G06440		AT3G45510
AT5G38280		AT3G49170
AT1G35290		AT3G51820
AT3G28540		AT5G44380
AT3G14530		AT5G57440
AT2G23170		AT1G34060
AT1G71691		AT2G13560
AT1G66950		AT2G29480
AT4G19800		AT3G13550
AT4G27420		AT4G02290
AT3G24300		AT4G15110
AT5G37650		AT5G01190
AT1G34520		AT5G21930
AT2G28850		AT5G42180
AT2G07140		AT1G06130
AT3G05610		AT1G59730
AT4G13510		AT2G26400
AT5G36190		AT2G28100
AT3G10720		AT2G34000
AT5G13800		AT2G36970
AT5G37920		AT3G22350
AT1G31690		AT3G23470
AT2G15350		AT3G47390
AT5G36200		AT4G15975
AT3G55130		AT5G04360
AT2G28860		AT5G23530
AT2G23250		AT5G64210
AT5G47000		AT1G01280
AT3G45470		AT1G01290
AT4G19760		AT1G02400
AT5G03810		AT1G05260
AT4G38190		AT1G14860
AT3G29636		AT1G22440
AT4G19750		AT1G33320
AT3G10280		AT1G51320
AT4G19740		AT1G52191
AT3G45555		AT1G58265
AT5G19580		AT1G70680
AT3G21780		AT1G78480
AT3G28510		AT2G01350
AT4G12150		AT2G30830
AT2G19410		AT2G32790
AT3G18660		AT2G38995
AT3G28520		AT2G39620
AT4G32210		AT2G44581
AT1G66660		AT2G47750
AT1G44318		AT3G03190
AT2G37730		AT3G03250
AT1G23200		AT3G15650
AT4G02180		AT3G15690
AT1G60360		AT3G44550
AT4G11050		AT3G51430
AT2G14960		AT3G55120
AT1G06090		AT3G55870
AT1G45201		AT3G59845
AT5G64110		AT4G02260
AT4G19810		AT4G13090
AT3G45460		AT4G14170
AT3G45540		AT4G17245
AT1G35330		AT4G25810
AT1G06800		AT4G32370
AT4G19720		AT4G33040
AT1G11780		AT5G01410
AT5G09700		AT5G02540
AT4G08770		AT5G07800
AT2G38230		AT5G12040
AT5G42100		AT5G16350
AT5G28960		AT5G18600
AT2G46500		AT5G19730
AT1G19170		AT5G20110
AT3G26820		AT5G36880
AT3G28345		AT5G38410
AT5G26120		AT5G43600
AT1G54940		AT5G55810
AT1G55570		AT5G63170
AT4G22090		AT5G65860
AT4G13260		AT4G15260
AT4G15660		AT5G34780
AT4G37770		AT5G13800
AT1G74110		AT1G30860
AT5G64120		AT2G03010
AT1G22360		AT1G23740
AT2G28630		AT1G53840
AT2G43600		AT3G55310
AT5G24780		AT4G11640
AT3G27710		AT1G24430
AT4G33840		AT1G29660
AT1G66000		AT2G37790
AT4G10310		AT3G21560
AT3G28600		AT3G26160
AT2G26450		AT3G55090
AT5G66280		AT4G33820
AT2G42350		AT4G37160
AT3G46170		AT4G39660
AT2G47140		AT5G37230
AT1G10270		AT5G38460
AT1G13210		AT1G11090
AT4G16260		AT1G76130
AT1G01120		AT2G22530
AT1G69940		AT3G55940
AT3G27720		AT4G20050
AT3G32980		AT5G05600
AT2G42360		AT5G25180
AT3G21760		AT5G59600
AT3G28340		AT1G05590
AT4G34480		AT1G25230
AT5G21105		AT2G18560
AT2G19060		AT2G45560
AT3G25620		AT3G56820
AT1G55560		AT2G45440
AT2G25370		AT3G25770
AT3G19890		AT4G21210
AT4G33830		AT4G37870
AT4G33860		AT5G03860
AT1G47390		AT5G25130
AT3G47050		AT5G28020
AT3G61510		AT1G19540
AT4G12280		AT1G48700
AT1G62660		AT1G51990
AT2G22810		AT1G59700
AT4G29610		AT2G03550
AT4G29600		AT2G46890
AT3G46500		AT5G12940
AT4G00360		AT1G11820
AT2G28830		AT1G20950
AT5G04530		AT5G27530
AT2G15370		AT1G02360
AT1G05250		AT1G03850
AT3G44120		AT1G19190
AT1G05240		AT1G27680
AT5G60510		AT1G52400
AT5G63570		AT1G61720
AT3G25060		AT1G61810
AT2G33750		AT1G67740
AT1G60190		AT1G71960
AT3G62720		AT1G78390
AT3G01200		AT1G78960
AT5G19290		AT2G25710
AT5G51490		AT2G29090
AT3G26770		AT2G29490
AT3G26610		AT2G39420
AT3G47750		AT2G41300
AT1G66120		AT2G43890
AT3G17560		AT3G14320
AT1G19900		AT3G14390
AT2G46760		AT3G57610
AT2G38110		AT3G60880
AT3G55110		AT3G62110
AT1G64930		AT4G12210
AT1G07850		AT4G13560
AT3G28610		AT4G15130
AT1G34490		AT4G23500
AT4G16230		AT4G25600
AT5G52400		AT4G32790
AT1G05800		AT4G35010
AT2G18140		AT4G38040
AT3G47180		AT5G03690
AT4G19730		AT5G10300
AT4G29640		AT5G15070
AT3G55700		AT5G20400
AT1G64950		AT5G25560
AT3G52450		AT5G38420
AT4G15500		AT5G40760
AT1G28480		AT5G49810
AT1G51440		AT5G51000
AT2G39350		AT5G51260
AT3G18320		AT5G51810
AT4G19820		AT5G55050
AT4G30280		AT5G55320
AT5G18890		AT3G43190
AT1G80330		AT3G60961
AT1G03495		AT3G55650
AT3G51070		AT3G26170
AT4G34215		AT4G32210
AT5G40000		AT2G46500
AT3G52960		AT2G42360
AT4G38220		AT3G21760
AT3G19895		AT5G54810
AT5G06340		AT1G60190
AT1G30860		AT3G62720
AT2G03010		AT1G34040
AT2G39720		AT2G39720
AT5G62220		AT5G62220
AT5G60010		AT1G09940
AT3G47760		AT1G17430
AT5G23990		AT1G45191
AT2G32860		AT4G15240
AT1G67110		AT4G34390
AT4G39650		AT1G63900
AT1G28700		AT2G31550
AT4G39000		AT3G15930
AT1G65450		AT4G02340
AT2G16730		AT4G08870
AT4G22110		AT4G37640
AT1G53820		AT5G51920
AT5G51930		AT3G12800
AT2G29840		AT4G01690
AT5G38000		AT4G15760
AT2G18150		AT5G11610
AT2G23900		AT1G15210
AT2G21910		AT1G58080
AT3G49210		AT2G36700
AT1G11600		AT4G37380
AT1G77780		AT5G15050
AT3G29590		AT1G22400
AT1G22370		AT2G28190
AT2G35930		AT3G16880
AT4G29620		AT1G06290
AT5G20860		AT1G48690
AT2G18190		AT1G55670
AT1G71690		AT1G78955
AT2G23210		AT2G32740
AT2G15090		AT2G35910
AT2G28420		AT3G24360
AT2G29040		AT4G26400
AT3G13784		AT5G04040
AT1G51500		AT5G14930
AT2G46160		AT5G23230
AT4G09100		AT1G13140
AT2G44040		AT2G38060
AT3G06470		AT3G08820
AT3G61550		AT3G54440
AT5G52320		AT4G02480
AT1G10560		AT4G10230
AT1G09940		AT4G30300
AT1G17430		AT4G37370
AT1G45191		AT5G07270
AT4G15240		AT5G11550
AT4G34390		AT5G15180
AT1G17160		AT5G21060
AT2G07560		AT5G37460
AT3G14550		AT5G60820
AT1G77170		AT5G62840
AT1G31670		AT5G67310
AT5G58860		AT1G02940
AT2G39040		AT1G21430
AT5G17750		AT1G21440
AT5G51500		AT1G55740
AT2G41850		AT2G44350
AT4G29580		AT3G30460
AT1G54560		AT3G49160
AT4G00400		AT3G58790
AT2G22950		AT5G37270
AT3G07830		AT5G45900
AT1G05280		AT5G52190
AT1G13130		AT1G35183
AT3G23630		AT1G71920
AT3G59610		AT1G73290
AT4G28780		AT2G43820
AT1G14240		AT3G24230
AT4G19770		AT3G24670
AT5G64100		AT3G27240
AT3G49200		AT4G10030
AT4G18340		AT4G33870
AT4G26200		AT1G05530
AT5G56490		AT1G19550
AT2G46720		AT2G21770
AT5G15110		AT3G18680
AT1G33811		AT3G58740
AT2G04020		AT1G01460
AT2G23800		AT1G09100
AT3G57240		AT1G11990
AT5G43760		AT1G13860
AT1G34500		AT1G16760
AT1G77830		AT1G17150
AT2G21045		AT1G19720
AT3G14510		AT1G19730
AT2G30220		AT1G22100
AT4G15490		AT1G23190
AT1G14730		AT1G23250
AT1G30080		AT1G26850
AT3G57140		AT1G30540
AT2G14620		AT1G48470
AT3G23460		AT1G50110
AT4G29270		AT1G60590
AT1G69640		AT1G69920
AT3G16340		AT1G70500
AT5G48440		AT1G70670
AT2G25410		AT1G72220
AT4G36250		AT1G74990
AT1G63900		AT1G79470
AT2G31550		AT1G79480
AT3G15930		AT2G48080
AT4G02340		AT3G02020
AT4G08870		AT3G05870
AT4G37640		AT3G08860
AT5G51920		AT3G09540
AT1G56000		AT3G12780
AT4G13410		AT3G19000
AT4G16490		AT3G19410
AT4G24520		AT3G21120
AT3G48950		AT3G22700
AT3G61200		AT3G29720
AT4G38600		AT3G43220
AT5G61730		AT3G45140
AT4G23560		AT3G46120
AT5G23980		AT3G50210
AT1G63450		AT3G54420
AT3G26140		AT3G54600
AT5G24910		AT3G58030
AT3G01270		AT3G61580
AT2G19010		AT4G00620
AT2G44560		AT4G16470
AT3G24700		AT4G24080
AT4G23600		AT4G24340
AT3G03670		AT4G35830
AT3G11430		AT4G36360
AT5G23190		AT5G05080
AT3G22740		AT5G10650
AT1G24540		AT5G15120
AT5G64790		AT5G18860
[truncated: 1,220 more rows]
