# Supplementary material for: A novel bivalent chromatin associates with rapid induction of camalexin biosynthesis genes in response to a pathogen signal in Arabidopsis
Source: eLife. 2021 Sep 15;10:e69508. doi: 10.7554/eLife.69508 (PMC8547951; doi:10.7554/eLife.69508)
Supplement: Figure 2—source data 1. [file elife-69508-fig2-data1.xlsx]

## Sheet: Fig.2B
		Mean			SD
		H3K27me3+NoAb	H3K27me3+H3K27me3	H3K27me3+H3K18ac	H3K27me3+NoAb	H3K27me3+H3K27me3	H3K27me3+H3K18ac
	Negative con	1.45249	9.89773	7.21569	1.31548	2.23186	2.06272
	H3K18ac_only	3.19	4.76	3.59	1.086	0.923	1.36
	H3K27me3_only	1.00248	35.7911	3.84695	0.920192	4.86031	1.9251
	GLK	5.32077	63.7732	46.5868	1.1431	13.4108	5.2129
	CYP79B2	4.14598	32.4247	33.5666	0.96961	7.61042	2.95038
	CYP71A13	6.2239	63.5394	44.1056	1.86865	6.61577	3.87503
	PAD3	3.75539	32.1939	23.7936	1.00225	8.19682	3.23127

## Sheet: Fig.2C
		Mean			SD
		H3K18ac+NoAb	H3K18ac+H3K18ac	H3K18ac+H3K27me3	H3K18ac+NoAb	H3K18ac+H3K18ac	H3K18ac+H3K27me3
	Negative con	0.892868	11.6013	10.1963	0.781974	1.46054	2.32169
	H3K27me3_only	0.265	9.72387	5.64311	0.0584419	3.20149	1.07316
	H3K18ac_only	0.892868	48.2877	10.1963	0.281974	7.08583	2.32169
	GLK	2.29899	65.0515	38.5833	2.35963	11.1086	9.66023
	CYP79B2	2.39994	64.4035	37.4145	1.14456	14.8705	7.7927
	CYP71A13	2.04048	50.6295	35.1149	0.867608	9.72477	5.07912
	PAD3	0.988317	37.9322	32.4862	0.0363747	3.65369	10.3332
