# Supplementary material for: A novel bivalent chromatin associates with rapid induction of camalexin biosynthesis genes in response to a pathogen signal in Arabidopsis
Source: eLife. 2021 Sep 15;10:e69508. doi: 10.7554/eLife.69508 (PMC8547951; doi:10.7554/eLife.69508)
Supplement: Figure 3—source data 1. [file elife-69508-fig3-data1.xlsx]

## Sheet: Fig3.A-C
			Fold change					SD
	Gene	Mutant line	5m_FC	30m_FC	1h_FC	3h_FC	6h_FC	5m_SD	30m_SD	1h_SD	3h_SD	6h_SD
	CYP71A13	Col-0	1.02019	1.5602	1.68387	2.58917	5.55445	0.105163	0.0173223	0.365167	0.303187	1.42721
	CYP71A13	pkl-1	1.77342	2.4292	2.41828	3.74266	9.45245	0.08898	0.278803	0.559524	0.550781	1.61517
	CYP71A13	clf28	2.22963	1.99394	2.77301	3.90555	8.62217	0.461136	0.348594	0.328195	0.536924	1.70211
	CYP71A13	idm1	1.16392	1.09973	1.90322	1.55357	2.85711	0.029253	0.119352	0.00734731	0.0948156	0.249823
	CYP71A13	idm2	1.29502	1.1392	1.94829	1.28182	4.03996	0.279214	0.215569	0.113393	0.121214	0.184884
	CYP71B2	Col-0	0.984035	1.39697	1.56941	2.24164	2.24405	0.0248586	0.130985	0.1235	0.158839	0.152368
	CYP71B2	pkl-1	1.781	1.84656	2.18638	3.26555	3.49735	0.386712	0.441352	0.0843317	0.588535	0.611738
	CYP71B2	clf28	1.91423	1.9417	2.1037	2.25563	2.69273	0.190406	0.133258	0.245953	0.360552	0.355714
	CYP71B2	idm1	0.919915	1.01586	1.08005	1.74549	1.53934	0.277517	0.239748	0.380636	0.396674	0.12673
	CYP71B2	idm2	1.06107	1.56066	1.05593	1.57006	1.52802	0.306174	0.1178	0.177473	0.237989	0.0690816
	PAD3	Col-0	1.2154	1.74316	2.44903	2.54751	5.57	0.227116	0.374409	0.483367	0.309397	0.751963
	PAD3	pkl-1	1.55863	2.28321	3.11091	3.90538	7.05785	0.14184	0.0749454	0.0124639	0.371902	0.511738
	PAD3	clf28	1.63685	2.03742	3.00392	3.30126	6.49	0.326748	0.0695027	0.240078	0.278907	0.626001
	PAD3	idm1	1.01737	1.28153	1.76275	2.19135	2.90065	0.0275629	0.175307	0.0866019	0.245192	0.367911
	PAD3	idm2	0.966321	0.976578	1.74519	1.52493	2.84226	0.160121	0.182801	0.281989	0.222159	0.352603

## Sheet: Fig3.D
		Mean content					SD
	Lines	5m	30m	1h	3h	6h	SD-5m	SD-30m	SD-1h	SD-3h	SD-6h
	Col-0	1.14807	1.03769	1.23318	1.58011	2.54787	0.0630713	0.29669	0.411178	0.166111	0.547865
	pkl-1	0.898237	0.800754	1.65256	2.55419	2.63349	0.156237	0.369754	0.619586	0.1646	0.309487
	clf28	1.04939	1.15178	1.99868	3.11731	2.41705	0.226385	0.20978	0.251684	0.457679	0.34807
	idm1	1.10622	0.991655	1.09252	1.36122	1.86689	0.344216	0.136655	0.437598	0.223222	0.289888
	idm2	1.22366	1.08218	1.38838	1.22287	1.61284	0.271661	0.390179	0.27338	0.251875	0.12184

## Sheet: Fig3.E-F
		H3K18ac levels
	Gene	Col-con	Col-FLG	SD-con	SD-FLG
	CYP79B2	1	3.67796	0.282217	0.213757
	CYP71A13	1	2.70853	0.397753	0.164882
	PAD3	1	2.09224	0.305066	0.246899
		H3K27me3 elvels
	Gene	Col-con	Col-FLG	SD-con	SD-FLG
	CYP79B2	1	0.300954	0.0981638	0.115068
	CYP71A13	1	0.49391	0.0963359	0.103764
	PAD3	1	0.370357	0.171609	0.04
