# Supplementary material for: A novel bivalent chromatin associates with rapid induction of camalexin biosynthesis genes in response to a pathogen signal in Arabidopsis
Source: eLife. 2021 Sep 15;10:e69508. doi: 10.7554/eLife.69508 (PMC8547951; doi:10.7554/eLife.69508)
Supplement: Supplementary file 1. [file elife-69508-supp1.xlsx]

## Sheet: Sheet1
Supplementary File 1. Log2 fold change in the enrichment analysis to identify specialized metabolic pathways associated with both H3K27me3 and H3K18ac using total metabolic genes as background. NA represents non-statistically different enrichment or depletion.
Pathway name	H3K4me2	H3K4me3	H3K9ac	H3K9me2	H3K18ac	H3K27me3	H3K27me1	H3K36me2	H3K36me3	H3K27me2	H2Bub	5mC	H3K4me1	H4K5ac	H3.1	H3.3
glucosinolate breakdown	NA	-1.82017	-1.66237	1.55653	1.66904	2.30453	1.90087	-1.88069	-3.17318	NA	-6.90091	NA	-1.79897	NA	NA	-1.16145
indole-3-acetate biosynthesis II	NA	-1.35266	-1.11393	NA	1.15892	1.83154	NA	-1.83476	-2.15129	NA	-4.35247	0.744046	-0.803074	NA	NA	NA
camalexin biosynthesis	NA	-0.775628	NA	NA	1.29953	1.54484	NA	-1.86	-1.30206	NA	-4.55828	NA	-1.40904	NA	NA	NA
thalianol and derivatives biosynthesis	NA	-2.04764	-2.43785	NA	1.24015	1.3894	NA	NA	-2.45872	NA	-2.53437	NA	NA	NA	0.687113	NA
cytokinin-glucosides biosynthesis	NA	NA	1.73266	2.00904	1.58916	1.34201	2.35338	-1.93068	-1.34721	NA	-3.86343	0.97005	-1.17653	NA	NA	NA
brassinosteroids inactivation	NA	NA	1.76742	2.00904	1.58916	1.30248	2.35338	-1.93068	-1.34721	NA	-3.05608	0.97005	-0.95414	NA	NA	NA
glucosinolate biosynthesis from Xmethionine	-3.03842	-0.659202	NA	NA	0.6045	1.26049	NA	-0.655717	-0.795934	NA	-2.49832	NA	-1.09299	NA	NA	NA
anthocyanin biosynthesis	NA	-0.650248	NA	NA	0.745856	1.2192	NA	NA	-1.33341	NA	-0.800243	-2.21943	NA	NA	NA	NA
superpathway of scopolin and esculin biosynthesis	-3.59355	NA	NA	NA	0.900286	1.0538	NA	NA	-0.717397	NA	-2.27847	0.818047	-1.03903	NA	NA	NA
cinnamoyl-CoA biosynthesis	NA	0.715088	0.784186	NA	1.60354	0.965445	NA	NA	NA	NA	-2.28834	NA	-1.00953	NA	NA	NA
glucosinolate biosynthesis from tryptophan	-2.11299	NA	NA	1.02431	0.629136	0.939636	1.63168	-0.951942	-0.824987	NA	-3.00017	NA	-0.898232	NA	NA	NA
indole glucosinolate breakdown	-2.6016	NA	NA	1.84193	0.756635	0.938138	2.4493	-1.33226	-0.744329	NA	-2.89304	NA	-0.726972	NA	NA	NA
umbelliferone biosynthesis	NA	NA	NA	NA	0.861333	0.759861	NA	NA	NA	NA	-1.90126	NA	-1.02171	NA	NA	NA
aliphatic glucosinolate biosynthesis	-1.08588	NA	0.640569	NA	0.610669	0.73412	2.43138	NA	NA	NA	NA	NA	-0.946527	NA	NA	NA
glucosinolate biosynthesis from phenylalanine	-2.79503	NA	NA	NA	0.647929	0.720333	NA	-0.59283	-0.85536	NA	-2.78261	1.87333	-1.12125	NA	NA	NA
quercetin glycoside biosynthesis	NA	NA	1.01005	-0.9029	1.55944	0.696345	-0.658565	NA	-0.674195	NA	-2.33243	NA	-0.60735	NA	NA	NA
anthocyanidin modification	NA	NA	-0.922938	NA	0.718814	0.690628	NA	NA	-1.01348	NA	-1.97244	-1.48642	NA	NA	NA	NA
detoxification of reactive carbonyls in chloroplasts	NA	NA	NA	3.35651	0.63894	0.628015	NA	-0.65722	NA	NA	-1.08301	0.995585	-0.928605	NA	NA	NA
